# Supplementary material for: A rapid change in magma plumbing taps porphyry copper deposit-forming magmas
Source: Sci Rep. 2022 Oct 14;12:17272. doi: 10.1038/s41598-022-20158-y (PMC9568598; doi:10.1038/s41598-022-20158-y)
Supplement: Supplementary file 4 — Supplementary Information 4. [file 41598_2022_20158_MOESM4_ESM.xlsx]

## Sheet: Whole-rock sample list 
	Sample details for whole-rock analysis
		WGS84
	Sample	Lat	Long	Unit	Notes
	AMBX	38.9774	-119.238	Late porphyry dyke	Cross-cutting, older poprhyry dyke.
	AM1	38.9612	-119.231	McLeod QMD inner
	AM6A	38.9651	-119.233	Aplite dyke
	AM6B	38.9651	-119.233	LHG dyke	LHG dyke at LHG-McLeod QMD contact.
	AM13B	38.9774	-119.238	Porphyry dyke
	AM13E	38.9774	-119.238	Late porphyry dyke	Cross-cutting older poprhyry dyke.
	AM13 LHG	38.9774	-119.238	LHG upper
	AM13 BP	38.9774	-119.238	Porphyry dyke	Mineralised porphyry dyke, cut by mineralised aplite dykes
	AM13 BAP	38.9774	-119.238	Aplite dyke	Aplite dyke hosting mineralised miaroloitc cavities cutting porphyry dyke and LHG cupola
	AM18 LHG	38.9766	-119.23	LHG upper
	AM31E	38.9778	-119.239	Porphyry dyke
	AM35	38.9783	-119.238	Late basalt dyke
	AM37	38.9785	-119.237	Porphyry dyke
	AM39	38.9651	-119.228	LHG upper
	AM42	38.9816	-119.234	Aplite dyke
	AM54A	38.9794	-119.237	Aplite dyke	Mineralised aplite dyke, with miarolitic cavities. Mingling realtionship with porphyry dyke
	AM54P	38.9794	-119.237	Porphyry dyke	Porphry dye with mingling contacts with mineralised aplite dyke.
	AM58	38.9795	-119.234	Aplite dyke
	AM63A	38.9774	-119.236	Aplite dyke
	AM66	38.9771	-119.236	Porphyry dyke
	AM71	38.9766	-119.246	Porphyry dyke
	AM72	38.9741	-119.259	McLeod QMD Outer
	BH3	39.0023	-119.299	Porphyry dyke
	BH5	39	-119.298	Porphyry dyke
	BH8	39.0023	-119.291	Bear QM border
	BH10	39.0107	-119.293	Bear QM border
	MA7	39.0476	-119.239	Bear QM Inner
	MA9	39.0413	-119.242	Bear QM Inner
	LH1	38.9695	-119.134	Aplite dyke
	LH3	38.9696	-119.134	LHG deep
	LH4	38.9692	-119.134	Porphyry dyke
	LH9	38.9619	-119.112	Aplite dyke
	LH18	38.957	-119.105	Porphyry dyke
	LH21	38.9704	-119.106	Aplite body	Coarse grained aplitic body - grain size 1-2mm, equigranular. Aplitic dykes cutting the body. Cannot see contact with LHG in outcrop
	LH22	38.9644	-119.134	McLeod QMD inner
	LH24S	38.9566	-119.104	LHG deep	Sample from palaeo-deepest exposure of LHG (Dilles, 1987)
	LH25	38.9566	-119.104	LHG deep	Sample from palaeo-deepest exposure of LHG (Dilles, 1987)
	YM24	38.9803	-119.193	McLeod QMD inner
	YM26A	38.9802	-119.192	Aplite dyke
	YM33B	38.9854	-119.183	Porphyry dyke

## Sheet: XRF
X.R.F. Results for Lawrence Carter, CSM - FAMOS, Job: 5241
Pellet	Bead	Sample	SiO2	TiO2	Al2O3	Fe2O3	MnO	MgO	CaO	Na2O	K2O	P2O5	SO3	LOI	Total		As	Ba	Ce	Co	Cr	Cs	Cu	Ga	La	Mo	Nb	Nd	Ni	Pb	Rb	Sb	Sc	Se	Sn	Sr	Th	U	V	W	Y	Zn	Zr
L57716	LF44445	AMBX	63.6022	0.674152	16.4334	4.86942	0.0613231	2.30352	3.78631	4.46964	2.87365	0.244484	<0.001	1.15331	100.471		4.70155	1247.9	35.9543	57.9996	18.4398	<1.77	1009.31	21.3494	17.3781	2.11066	5.5209	20.1569	11.0033	5.70627	71.8798	<1.00	10.5837	<0.67	1.009	945.293	5.80198	2.5345	124.933	302.745	8.9346	52.593	121.916
L57717	LF44446	AM1	61.0291	0.857434	16.9523	2.68793	0.0434629	2.75068	8.52343	5.33151	0.181791	0.368234	<0.001	1.27666	100.003		4.70399	101.85	46.1575	53.9915	12.6374	2.26868	30.7153	23.2996	19.9399	2.78824	7.24497	25.4732	12.2787	<0.69	<0.24	<0.95	14.1991	<0.65	0.906603	1271.61	6.52297	3.51888	134.248	298.064	11.7759	21.8789	149.268
L57718	LF44447	AM6A	76.7269	0.0950806	12.6723	0.684207	0.00499254	0.0853844	0.818084	3.23381	5.19154	0.0190629	<0.001	0.205245	99.7366		0.598741	302.991	9.49079	139.279	<0.59	<1.65	5.65333	16.3495	9.86288	1.93645	6.49844	4.94865	<0.51	5.49198	153.029	<0.86	2.63854	<0.61	<0.79	251.021	14.5474	3.36275	7.68381	931.78	1.697	6.65484	43.882
L57719	LF44448	AM6B	70.6297	0.115919	16.192	0.81919	0.00996967	0.230684	1.75147	4.51833	4.75441	0.0540951	<0.001	0.357721	99.4336		3.09269	1640.85	7.169	105.728	<0.60	<1.70	12.8462	20.4525	9.94871	1.34874	6.47152	5.64483	<0.53	6.95089	129.079	<0.89	3.29469	<0.62	<0.83	841.032	9.13732	3.37798	12.3386	679.967	4.01992	11.9213	53.6584
L57720	LF44449	AM13B	61.6463	0.725087	16.4027	4.91303	0.0445316	2.58545	2.92	4.5188	3.0901	0.251571	0.0081952	1.07694	98.1827		9.10552	1184.82	34.7735	55.4695	13.7746	<1.72	2957.14	21.9	20.5871	6.55515	5.25277	18.2924	12.0315	3.73578	117.579	<1.00	9.36646	<0.67	1.61088	876.15	4.33864	3.21077	149.121	272.111	8.99889	51.7965	116.441
L57721	LF44450	AM13E	61.41	0.720569	16.7283	6.08453	0.0346093	2.70782	3.38227	4.49842	3.11757	0.326891	0.0102362	1.17474	100.196		3.42219	1625.88	53.0137	53.9397	42.5449	<1.78	466.44	21.9929	28.8009	1.65884	5.20079	25.2481	20.4475	1.43292	103.361	<1.03	10.7387	<0.70	<0.96	1086.28	3.56253	4.68384	135.646	222.303	9.79433	26.4034	113.889
L57722	LF44451	AM13 LHG	66.984	0.475332	16.0942	2.95694	0.0198835	1.30421	2.2076	4.28434	4.20319	0.162829	<0.001	0.634751	99.3272		3.50954	2732.3	38.5622	87.6044	9.31448	<1.76	811.071	19.9768	24.1135	1.64764	6.40605	18.085	7.0138	4.15473	102.743	<0.98	5.77634	<0.67	<0.91	1109.86	3.79345	1.63181	72.956	546.364	6.54565	24.223	123.6
L57723	LF44452	AM13 BP	64.4031	0.58426	16.2341	4.15703	0.0307308	1.99358	2.82579	4.57261	3.24502	0.226111	<0.001	0.917084	99.1893		6.4337	1176.44	32.5374	63.847	9.23117	<1.72	2078.01	22.4489	21.6117	2.47133	5.20537	14.4632	10.574	2.85072	101.34	<0.98	7.18166	<0.66	<0.90	912.248	4.88949	2.57897	114.283	349.317	6.97799	32.1359	112.707
L57724	LF44453	AM13 BA	73.0685	0.205499	13.8004	1.59518	0.0119428	0.441542	1.60788	3.61219	4.62003	0.217004	<0.001	0.531491	99.7116		2.93364	1084.43	20.4116	103.792	12.5167	<1.69	416.92	16.8206	14.2933	1.48747	5.64365	11.967	2.33173	3.00473	77.1323	<0.90	3.61601	<0.62	<0.83	655.531	8.31587	1.89708	40.7073	631.589	3.50668	15.5152	84.4343
L57725	LF44454	AM18	69.4579	0.342888	15.4652	2.04725	0.0279254	0.862875	2.51031	4.54613	3.68197	0.129275	<0.001	0.320946	99.3926		3.06648	1291.76	27.7044	94.9	<0.61	<1.70	19.6398	20.6985	17.5469	1.52736	6.19411	14.38	2.53168	6.98578	88.3561	<0.92	4.68748	<0.64	<0.85	975.547	7.64072	2.73384	45.8721	630.963	4.40226	22.0999	106.805
L57726	LF44455	AM31E	71.0267	0.437302	15.7604	0.759596	0.00695662	1.11676	3.5635	5.70232	0.38878	0.166763	<0.001	0.673375	99.6024		4.097	230.182	30.1229	100.209	3.83304	<1.62	149.377	22.3883	17.209	0.910856	6.73717	17.4428	0.8587	2.33049	11.2459	<0.85	5.62064	<0.60	3.08541	1077.5	9.10862	3.13145	59.4104	665.425	5.24963	10.005	123.888
L57727	LF44456	AM35	49.5178	0.841956	16.9131	10.0685	0.167804	7.42978	8.82425	2.4828	0.937416	0.190052	0.0050204	3.07251	100.451		5.8554	524.942	23.5482	67.7763	168.36	<1.89	101.452	16.5159	6.95072	1.16575	5.49907	9.94262	73.7572	3.36283	18.8073	1.68727	34.3687	<0.77	<1.05	787.247	1.95231	<0.53	251.421	161.939	21.5197	59.242	75.2889
L57728	LF44457	AM37	69.6038	0.391566	16.2159	2.27939	0.00991498	1.12415	2.1242	4.65535	3.3882	0.154421	<0.001	0.914161	100.861		3.22615	1888.86	20.3395	71.6466	<0.62	<1.73	615.551	21.2354	17.4985	0.765853	5.44991	13.5554	5.22891	5.19509	62.1976	<0.92	4.25272	<0.62	1.08925	933.907	4.42207	2.39979	64.1784	427.069	4.27606	14.2324	103.143
L57729	LF44458	AM39	68.4987	0.372447	15.693	2.43889	0.0268969	0.953076	2.78379	4.4054	3.69675	0.153149	<0.001	0.435788	99.4579		2.13569	1619.79	31.9057	98.1219	<0.59	<1.73	5.7596	19.4405	21.8927	1.49507	6.17516	17.0323	2.98915	5.79936	80.3945	<0.95	5.7648	<0.66	<0.88	1053.53	4.27268	1.70582	50.1118	633.246	5.0364	17.7296	109.179
L57730	LF44459	AM42	77.0895	0.0840183	12.3848	0.562414	0.00299364	0.0752917	0.482746	3.15135	5.51342	0.0090241	<0.001	0.267589	99.6231		<0.43	214.54	12.0083	129.292	7.97805	<1.64	25.4897	17.4667	12.2454	1.5906	6.87559	6.89095	<0.50	3.94208	146.137	<0.85	1.71434	<0.60	<0.79	186.755	22.1973	3.88598	13.3271	843.748	1.39011	6.77448	52.0046
L57731	LF44460	AM54A	77.818	0.0919219	12.2674	0.396226	0.00498407	0.0611719	0.47025	3.35283	5.12158	0.0110177	<0.001	0.37495	99.9703		1.70503	331.043	3.53134	130.831	11.9781	<1.64	390.218	18.7157	8.19508	2.37829	6.78963	3.26093	<0.50	4.31795	119.975	<0.85	1.27437	<0.60	<0.78	187.942	31.3914	7.32464	10.5315	831.627	1.15694	9.54588	111.129
L57732	LF44461	AM54P	67.0081	0.558019	16.0776	3.30576	0.0345479	1.46472	3.16173	4.43575	3.05149	0.242998	<0.001	1.35714	100.698		3.19552	1491.91	50.8044	51.3178	19.5482	<1.74	528.898	20.9487	29.4535	2.21189	5.87094	23.9839	11.5169	6.52518	63.9547	1.14485	7.23812	<0.64	<0.89	1118.87	5.86083	2.55402	80.0539	268.18	7.43947	45.2532	125.314
L57733	LF44462	AM58	65.6229	0.570113	16.0413	4.00736	0.0406271	1.80334	3.62159	4.31118	3.18886	0.201125	<0.001	0.969327	100.378		3.12252	1425.51	33.6782	77.9917	11.3572	<1.76	298.093	21.3616	23.2147	2.49985	5.80649	16.9178	13.0541	5.6256	85.2039	<0.98	8.04655	<0.66	<0.91	958.945	5.74021	4.34835	96.8277	424.46	7.10875	40.1356	108.492
L57734	LF44463	AM63A	74.1747	0.200922	13.3226	1.39729	0.0139618	0.353155	1.07778	3.20771	5.47899	0.0871801	<0.001	0.327849	99.6421		1.70288	469.396	16.0162	106.141	<0.60	<1.67	31.5638	15.6296	12.9497	1.87093	6.4807	9.5228	1.04794	5.67972	136.106	<0.89	1.66791	<0.62	<0.82	403.694	5.15221	1.62212	27.4333	691.066	3.27847	14.5525	69.7284
L57735	LF44464	AM66	67.7567	0.423741	15.4315	2.4402	0.0258624	0.910635	2.54155	4.38584	3.57223	0.162917	<0.001	0.575264	98.2264		2.81993	1416.35	40.1949	96.3938	8.05877	<1.70	303.074	20.9184	22.9314	1.59676	6.4065	18.0687	4.21693	7.19869	78.311	<0.93	4.73233	<0.65	<0.87	1008.17	7.54575	1.63948	52.6012	612.171	5.94133	28.4977	113.057
L57736	LF44465	AM71	66.6116	0.438001	16.0249	1.52405	0.0208557	1.19194	3.3691	4.75905	3.66544	0.189602	<0.001	0.73246	98.527		2.91901	1886.58	33.1997	70.3837	6.84151	<1.73	7.51743	18.4892	20.9258	0.980192	5.46287	18.1525	6.52237	2.77141	68.5447	1.17794	5.49454	<0.62	<0.86	1044.47	3.39259	1.73427	58.1163	402.584	5.76807	14.0483	103.41
L57737	LF44466	AM72	62.4081	0.834979	17.5379	3.08711	0.0475449	2.14344	5.96452	6.14347	0.575765	0.320481	<0.001	1.00485	100.068		4.64056	201.189	53.2479	62.6313	11.7625	<1.74	124.3	22.7152	27.1654	1.64204	6.66639	29.198	12.0468	1.14213	19.065	<0.93	9.74826	<0.64	1.60995	1120.45	5.62042	2.36767	132.158	326.702	11.4931	26.7353	134.936
L57738	LF44467	BH3	69.7331	0.457362	15.348	1.47462	0.00395059	0.399425	0.262144	3.56774	6.44615	0.100232	0.00920148	1.27945	99.0814		2.76147	3631.36	14.2128	81.2909	4.80533	<1.77	52.2506	15.5796	14.8751	5.10797	6.12864	9.63716	<0.55	4.91545	114.692	<0.94	5.13505	<0.61	<0.87	279.325	6.08692	2.56281	48.2624	480.836	3.66886	7.31321	125.137
L57739	LF44468	BH5	60.5593	0.890373	16.6292	5.74988	0.0714603	2.5661	4.84619	4.61208	3.00836	0.334088	<0.001	0.806508	100.074		4.99028	1310.74	54.6078	75.8498	14.8911	<1.80	18.0991	22.6138	27.0934	1.51371	6.96552	26.1485	15.4943	6.86154	73.8469	<1.03	10.0771	<0.71	<0.96	1031.68	4.9981	1.85268	136.372	415.536	11.5257	41.5619	122.321
L57740	LF44469	BH8	66.099	0.684059	16.654	1.60976	0.0267049	1.29254	3.73575	3.97541	3.95782	0.257401	<0.001	1.14237	99.4348		5.32491	1493.85	56.2596	61.6617	5.97518	<1.76	57.576	20.9221	33.3205	3.37311	8.44384	27.5704	4.75463	3.94462	99.6787	1.43133	8.84495	<0.63	2.09366	906.437	13.305	6.8735	86.6888	404.963	16.5155	19.8453	168.207
L57741	LF44470	BH10	63.0917	1.03519	17.9261	2.28411	0.0304188	2.91617	2.99037	6.69626	0.74953	0.331493	<0.001	1.90319	99.9546		10.0892	228.728	58.3949	37.6146	12.8366	<1.67	1375.94	23.8583	21.6467	1.26015	10.4904	33.6202	6.83039	1.76076	25.6915	2.99386	9.37821	<0.58	2.3854	707.759	17.5931	4.54782	123.334	236.127	18.3603	20.6879	247.247
L57749	LF44478	MA7	67.4685	0.59744	16.0379	2.04756	0.0109093	1.50956	3.68826	3.89827	3.33023	0.205283	<0.001	0.878051	99.6719		4.16455	1488.66	43.5198	98.7253	22.1528	<1.73	579.012	20.1113	24.3465	6.20478	7.98219	21.0673	7.36159	3.66661	85.0834	2.21301	6.70909	<0.65	2.4548	1065.06	7.35543	3.53016	86.4458	581.952	10.4862	10.9932	146.291
L57750	LF44479	MA9	67.4411	0.59474	16.3297	1.61735	0.0328532	1.6185	4.74241	5.99717	0.833994	0.224076	<0.001	0.500858	99.9328		4.29829	527.531	47.5768	91.6724	3.30946	<1.69	8.75821	20.0156	28.3984	2.17381	9.03051	22.3471	9.60921	<0.62	16.3982	<0.86	8.58534	<0.61	2.12011	1047.78	9.82137	3.78518	72.0527	556.316	11.0133	17.5294	153.51
L57751	LF44480	LH1	77.2729	0.100969	12.6648	0.270212	0.00299207	0.0351178	1.00594	3.48628	4.69208	0.0110237	<0.001	0.3203	99.8625		1.22667	399.61	<7.10	145.897	3.75812	<1.63	7.71503	16.8358	8.63713	1.56144	6.8869	3.66158	<0.49	3.41087	99.5965	<0.82	<1.11	<0.59	<0.77	307.581	24.6653	4.22213	8.49753	931.172	0.396048	5.59274	76.1344
L57752	LF44481	LH3	66.867	0.528162	15.6073	1.82946	0.0318145	1.40527	3.98914	4.64701	3.18548	0.208787	<0.001	0.629325	98.9287		4.45504	1313.44	39.7372	86.8167	22.5067	<1.73	33.9717	19.5406	26.2841	1.49177	6.87984	21.4631	7.64713	3.95044	59.5669	3.05541	5.8248	<0.63	1.40412	1061.61	6.87969	3.12048	62.8759	519.944	7.73149	16.9909	132.563
L57753	LF44482	LH4	64.115	0.692443	16.2343	3.19457	0.0267992	1.86228	4.91308	3.99444	3.71426	0.308177	<0.001	0.798797	99.8542		7.48107	2178.64	35.7031	64.5769	29.9164	<1.80	20.1242	21.6748	22.3042	0.644458	5.23999	23.1089	22.6263	2.40854	66.0101	<0.97	7.45929	<0.68	<0.92	1600.21	4.41665	1.67178	95.446	343.363	6.03751	22.4205	126.852
L57754	LF44483	LH9	59.4447	0.658859	24.7495	0.229104	0.00397772	0.0660277	6.78289	7.38684	0.174011	0.00999212	<0.001	0.614013	100.12		5.65719	95.0164	44.2723	79.404	<0.60	2.14779	187.173	24.2512	18.2393	0.490242	7.12584	23.3944	<0.51	3.86799	<0.24	<0.85	2.0319	<0.60	2.48576	1743.73	1.79379	1.01422	27.8213	406.026	7.76315	6.81118	147.511
L57755	LF44484	LH18	59.5448	0.664773	16.5872	5.18235	0.0805408	2.62484	6.10797	4.53543	3.06889	0.320715	<0.001	0.619127	99.3367		5.20277	2749.4	71.5346	46.6989	27.2373	<1.85	98.1378	21.0227	37.4259	0.359382	4.6471	39.8851	13.7992	26.3661	43.9059	<1.04	13.8945	<0.73	<0.99	2460.23	2.63744	1.18962	129.571	199.548	8.53052	68.7857	81.8542
L57756	LF44485	LH21	76.8199	0.103878	12.4774	0.556056	0.0229519	0.0472335	0.73103	3.46937	4.93357	0.014005	<0.001	0.237621	99.413		<0.42	242.043	27.9645	92.6877	8.70363	<1.63	7.59885	12.4504	17.6076	1.03955	9.16097	10.2168	<0.48	16.6279	163.536	<0.82	1.99003	<0.56	<0.77	60.6706	15.7389	3.50333	4.61901	586.203	8.87039	5.85284	88.1679
L57757	LF44486	LH22	64.7894	0.6625	16.0139	2.849	0.0516015	2.04369	6.95824	4.87925	0.264302	0.265604	<0.001	0.792366	99.5699		4.66253	91.722	46.9285	75.7907	20.9439	<1.73	13.1419	21.1147	23.4876	1.45465	7.01195	25.2102	12.1488	3.59572	4.62402	2.06212	10.6562	<0.64	3.0412	1206.87	6.63856	2.97217	100.111	438.821	9.69642	34.5954	128.607
L57759	LF44488	LH25	68.9479	0.429874	15.8045	2.00125	0.0278616	1.06912	4.50085	5.0299	1.33893	0.167973	<0.001	0.550108	99.8683		4.11349	728.49	37.2528	117.176	23.1185	<1.69	9.75058	21.6323	24.1284	1.30965	7.01749	18.6459	4.01291	3.34885	26.0813	<0.88	5.8198	<0.64	3.06721	1243.79	7.06219	4.75438	62.7131	661.097	5.70063	16.1086	115.337
L57760	LF44489	LH24S	68.4051	0.37887	15.5691	2.35848	0.0338677	0.847668	3.0037	4.55219	3.39792	0.150781	<0.001	0.415141	99.1128		3.78214	1757.97	34.8773	93.9864	0.844763	<1.71	8.86076	19.4222	20.5912	1.20366	6.1362	16.8081	4.22793	6.62303	69.2101	<0.92	3.70334	<0.65	<0.87	1212.27	3.99533	1.38722	50.4644	590.73	4.94954	28.8751	109.312
L57761	LF44490	YM24	68.012	0.749375	16.2731	1.17633	0.0128559	1.96687	2.68623	4.9929	2.27547	0.260343	<0.001	1.15915	99.5646		2.87377	662.307	31.5838	90.8603	14.6086	<1.67	1069.09	21.1528	16.421	1.90382	10.9474	22.4037	8.28192	10.2793	59.3656	<0.85	7.92033	<0.61	4.40477	850.01	15.1789	4.5403	108.615	593.49	13.663	33.7161	237.077
L57762	LF44491	YM26A	63.0548	0.0228064	22.6973	0.448003	0.00296779	0.116441	2.91209	8.85324	0.605876	0.0705755	0.00819249	1.12878	99.9211		4.87519	207.343	26.6072	44.8895	<0.57	<1.60	1884.42	14.0513	17.8627	<0.13	2.07805	14.4889	<0.48	8.42433	7.38342	1.57014	<1.09	<0.54	1.05028	1474.63	<0.47	1.38474	3.46462	233.334	2.32559	12.7285	9.6225
L57763	LF44492	YM33B	78.7003	0.128681	12.4969	0.48316	0.00696634	0.262311	2.36437	5.09274	0.267222	0.0239995	0.010302	0.539253	100.376		3.78804	74.4924	7.40205	88.2435	4.82608	<1.57	18.441	15.7713	5.41824	1.79349	4.94498	5.19442	<0.46	-0.318101	5.90805	<0.79	<1.07	<0.55	<0.75	829.685	21.2683	4.45832	23.3582	547.713	0.802901	4.93884	71.51
Notes
i)	Major elements determined on fused glass beads prepared from ignited powders
	sample to flux ratio 1:5, 80% Li metaborate: 20% Li tetraborate flux
	results quoted as component oxide weight percent, re-calculated to include LOI
ii)	Samples analysed on University of Leicester, Department of Geology
	PANalytical Axios Advanced XRF spectrometer
iii)	Trace elements analysed on 32mm diameter pressed powder briquettes
	7.5g sample mixed with 15-20 drops 7% PVA soln. as binding agent
	pressed at 10 tons per sq. inch
iv)	elements with concentrations below the lower limit of detection reported
	as <LLD

## Sheet: ICP-MS
	Sample	Sr	Y	Cs	La	Ce	Pr	Nd	Sm	Eu	Gd	Tb	Dy	Ho	Er	Tm	Yb	Lu	Hf
		ppm	ppm	ppm	ppm	ppm	ppm	ppm	ppm	ppm	ppm	ppm	ppm	ppm	ppm	ppm	ppm	ppm	ppm
	AGV-1	683.375	18.6179	0.964104	35.8361	67.8043	7.7473	32.0834	5.74035	1.66959	4.93259	0.655639	3.58429	0.626383	1.80375	0.267542	1.65163	0.245032	5.34583
	AGV-1 Preferred	661 +/-3.7	19.69 +/-0.31	1.252 +/-0.022	38.19 +/-0.27	68.61 +/-0.54	8.31 +/-0.11	32.07 +/-0.31	5.764 +/-0.06	1.658 +/-0.035	4.862 +/-0.069	0.673 +/-0.011	3.583 +/-0.04	0.68 +/-0.01	1.825 +/-0.019	0.2737 +/-0.0071	1.66 +/-0.015	0.2518 +/-0.0042	5.086 +/-0.042
	AGV-1 Range	586.89 - 744	13 - 23	0.16 - 2.29	22 - 56.2	54.1 - 76.1	6.57 - 17	25.8 - 43	4.72 - 7.8	1.4 - 2.58	0.66 - 6.51	0.51 - 4.79	2.8 - 11	0.4 - 0.97	1.6 - 2.09	0.23 - 0.38	1.43 - 2	0.2 - 0.37	2.742 - 5.55
	JR-3	10.1927	166.531	0.74795	185.074	337.143	31.7247	111.698	21.8715	0.437382	23.7101	4.36879	29.059	6.33786	19.9268	2.73608	20.7432	2.76448	46.4057
Bead	JR-3 Range	8.6 - 11.1	157 - 174	0.77 - 8.4	153.4 - 194	307.1 - 340	25.9 - 32.6	102 - 109.53	19.5 - 21	0.43 - 0.45	21.7 - 28.8	4.12 - 4.22	27.5 - 30	6 - 6.1	18.5 - 19.4	2.926 - 3	19.5 - 20.15	2.8 - 2.82	37.24 - 41.1
LF44445	AMBX	1039.32	10.1982	1.28706	23.4886	45.308	5.69003	24.1072	4.38056	1.27832	3.01712	0.402285	1.88891	0.34588	0.923197	0.187936	0.805687	0.111022	3.61706
LF44446	AM1	1399.74	13.626	0.170817	23.9331	48.8277	6.31938	27.493	5.1009	1.49302	3.73931	0.463912	2.40328	0.452491	1.30518	0.224418	1.18093	0.202855	4.96749
LF44447	AM6A	301.826	1.51137	1.36781	13.1862	14.2438	1.26592	4.03571	0.627077	0.216652	0.449639	0.0516589	0.259421	0.0453749	0.175863	0.0712001	0.150508	0.0296463	2.15842
LF44448	AM6B	949.958	4.16672	1.60523	12.4831	15.9707	1.60157	5.73512	1.04629	0.468032	0.77965	0.114364	0.584065	0.107493	0.381249	0.0731158	0.421839	0.0642893	2.64256
LF44449	AM13B	968.091	9.4641	2.12423	23.679	42.4881	5.35918	21.5124	4.1173	1.25292	2.87342	0.36928	1.81678	0.310507	0.937757	0.140107	0.81158	0.11529	3.69411
LF44450	AM13E	1232.61	10.282	1.7221	33.7755	64.6592	7.89699	31.6183	5.40909	1.45218	3.68589	0.430622	1.99739	0.360252	1.01324	0.147683	0.854136	0.139649	3.33468
LF44451	AM13 LHG	1282.53	7.19263	1.52011	25.772	50.549	6.42355	24.5799	4.1597	1.40014	2.73416	0.332515	1.4348	0.247358	0.794191	0.142842	0.676056	0.107167	4.11664
LF44452	AM13 BP	1058.17	7.93226	1.67336	21.1955	39.222	4.43831	19.0499	3.38792	0.946343	2.47042	0.294657	1.38782	0.255688	0.742166	0.125275	0.672115	0.105747	3.54519
LF44453	AM13 BA	785.434	4.19826	0.263562	17.1619	28.271	3.14442	12.5229	2.10368	0.674809	1.3724	0.160735	0.681063	0.134642	0.397977	0.0577506	0.334173	0.0611223	3.1927
LF44454	AM18	1099.28	5.56514	0.450841	23.1175	40.1894	4.60665	18.1158	2.96297	0.820718	1.93163	0.238021	1.00346	0.181801	0.46104	0.0905953	0.51461	0.0783074	3.83528
LF44455	AM31E	1268.56	6.76607	0.440841	20.3198	38.6271	4.60088	17.4078	3.11906	0.800137	2.17912	0.248499	1.26326	0.223136	0.661766	0.121554	0.649315	0.111459	4.43101
LF44456	AM35	957.555	22.9682	0.27356	12.3749	26.3862	3.36362	15.51	3.74774	1.26015	3.98852	0.60713	3.7288	0.768688	2.31465	0.344429	2.15647	0.3739	2.37754
LF44457	AM37	1063.35	5.547	0.557313	17.962	32.0638	3.87203	15.7276	2.82307	0.863548	1.87309	0.208485	0.922419	0.158417	0.491363	0.107625	0.42516	0.0712022	3.36794
LF44458	AM39	1215.62	6.14941	0.769078	23.5671	43.4106	4.99586	19.7772	3.23945	1.05398	2.1745	0.261896	1.10724	0.196471	0.53787	0.118909	0.541262	0.0852681	3.7426
LF44459	AM42	232.699	1.34069	0.520244	11.8073	15.8551	1.21731	3.69382	0.435589	0.159597	0.356638	0.0433401	0.200419	0.0382934	0.137502	0.059783	0.177099	0.0233214	3.31771
LF44460	AM54A	225.375	1.33845	0.370005	9.51752	8.08435	0.589877	1.7971	0.297819	0.221814	0.21084	0.0244998	0.134315	0.0295831	0.0953612	0.050649	0.179979	0.04109	6.86394
LF44461	AM54P	1359.73	9.17256	0.560677	32.5454	61.3062	7.50881	29.9898	5.31396	1.48184	3.319	0.401529	1.67137	0.301467	0.886219	0.127497	0.769736	0.117911	4.22734
LF44462	AM58	1111.37	7.95901	0.582843	25.446	44.6355	5.3162	20.8738	3.77442	1.20708	2.7125	0.329322	1.5124	0.248768	0.668561	0.142014	0.604994	0.101392	3.87145
LF44463	AM63A	476.377	3.25131	0.482165	15.3199	27.518	2.92159	10.6912	1.68643	0.505873	1.09869	0.129246	0.542398	0.103125	0.305746	0.0872293	0.310053	0.0553389	2.40956
LF44464	AM66	1209.8	7.10861	0.707065	27.3388	49.5009	5.82065	22.4777	3.6778	1.13222	2.38458	0.29684	1.29203	0.215992	0.665877	0.121723	0.611867	0.0954254	4.36652
LF44465	AM71	1257.47	7.03622	0.260118	23.3316	44.9907	5.28946	21.0219	3.7144	1.14944	2.53457	0.279105	1.18854	0.209611	0.692529	0.114274	0.567608	0.100673	3.65002
LF44466	AM72	1324.92	13.1361	0.309872	28.8992	56.4321	6.98576	29.077	5.53665	1.58997	4.19382	0.504039	2.57015	0.431123	1.236	0.208954	1.14805	0.165438	4.62687
LF44467	BH3	329.259	3.77349	0.46548	15.7235	29.6522	3.54322	15.4541	3.01426	1.21239	1.51671	0.178131	0.690868	0.134049	0.382572	0.0975054	0.435031	0.0757414	3.76174
LF44468	BH5	1206.15	12.7564	0.867864	30.3134	60.1758	7.52289	30.1146	5.51082	1.60853	4.12398	0.512948	2.43907	0.419085	1.24744	0.201176	1.10626	0.186171	4.63654
LF44469	BH8	1093.68	18.4032	0.824732	33.3135	65.168	8.101	32.2481	5.92327	1.62925	4.7659	0.570889	2.89043	0.54598	1.65957	0.230208	1.43301	0.25296	5.89021
LF44470R	BH10	858.812	18.9617	0.228742	24.0324	61.3506	9.06395	38.0704	7.61767	1.93895	5.72915	0.736344	3.62775	0.658294	1.87999	0.299708	1.73501	0.273012	8.15278
LF44478	MA7	1261.76	10.7084	1.46695	24.5286	49.1561	6.15967	24.9205	4.6799	1.34314	3.29506	0.428134	2.08268	0.373786	1.08056	0.142439	1.04108	0.169267	5.2265
LF44479	MA9	1234.33	12.6409	0.239052	31.0511	58.6998	7.09424	27.4577	5.01869	1.37939	3.64709	0.451744	2.23016	0.391626	1.32361	0.185418	1.0823	0.192099	5.34284
LF44480	LH1	357.418	0.762101	0.772234	9.26766	9.27286	0.675983	1.86919	0.300933	0.131403	0.149647	0.0203857	0.0889896	0.0162281	0.0726993	0.0280611	0.120901	0.0346351	3.88898
LF44481	LH3	1280.16	9.28849	0.442581	27.7997	53.0007	6.35425	25.5082	4.55204	1.30547	3.0357	0.375629	1.62539	0.291682	0.890417	0.140638	0.79894	0.129143	4.52107
LF44482	LH4	1882.83	7.94134	1.11889	22.7743	53.4288	7.11572	30.9038	5.66421	1.62394	3.40411	0.373268	1.46808	0.248452	0.734431	0.0951834	0.600183	0.0851953	4.36693
LF44483	LH9	1890.78	9.75113	0.447683	21.9144	50.9455	6.50997	27.5324	4.89554	1.13641	3.19728	0.406211	1.77875	0.315644	0.879548	0.126201	0.883265	0.119955	5.03603
LF44484	LH18	2830.06	10.8607	0.557081	43.1023	91.4153	11.5245	48.2381	7.97425	2.30221	4.56045	0.48693	2.1097	0.362359	1.08533	0.168266	0.944478	0.147241	3.05008
LF44485R	LH21	78.113	9.04341	1.09067	24.349	38.3144	3.91525	11.8198	1.93965	0.312283	1.59086	0.220767	1.22055	0.243845	0.932925	0.184936	1.1299	0.211067	4.20845
LF44486R	LH22	1436.26	10.912	0.421624	24.222	47.3831	6.02011	23.9409	4.39437	1.22549	3.30803	0.405731	1.91662	0.348949	1.01914	0.145591	0.892704	0.122619	4.55718
LF44488	LH25	1469.28	6.00113	0.42043	22.646	43.6546	5.17297	20.7374	3.49964	1.01796	2.20317	0.267974	1.25434	0.219381	0.630104	0.0937195	0.577344	0.0857159	4.0726
LF44489R	LH24S	1383.58	5.29212	0.743239	18.7516	39.034	4.74076	18.8542	3.29349	0.991703	2.00644	0.235974	1.06636	0.183578	0.538234	0.0489401	0.488582	0.0721441	3.86751
LF44490	YM24	1007.69	15.2219	1.13324	18.9997	38.884	5.25844	22.4181	4.59726	0.871622	3.73216	0.483234	2.50379	0.45237	1.4877	0.234511	1.379	0.22514	7.93832
LF44491	YM26A	1779.61	3.54212	0.224924	16.8089	32.2163	3.70996	14.0946	2.41119	0.883952	1.4198	0.188864	0.858521	0.144678	0.397269	0.102102	0.325396	0.0478582	0.542761
LF44492	YM33B	975.62	1.59237	0.168101	7.26442	9.22736	0.924468	3.28622	0.582377	0.228886	0.486493	0.0496233	0.248329	0.0418076	0.167728	0.0652095	0.193871	0.0379279	3.63069

## Sheet: XRF standards
IRM	Material	Date	Run No(s)		Rb	Sr	Y	Zr	Nb	Mo	Pb	Th	U	Ga	Zn	Cu	Ni	Co	Cr	V	Sc	Ba	La	Ce	Nd	Cs	As	Sb	Se	Sn	W	Au	Bi	Ag	Cd	Te	Tl
NIM-G	Granite		Rec. values		312	12.5	141	296	55.7	3	35.7	53.9	15	27	52.3	16.8	8	4	12	2	1.2	115	109	195	72	0.9	15	0.6	-	4	-	-	-	-	-	-	-
NIM-G	Granite	2015-02-01			316.531	11.1394	142.217	287.003	54.9819	1.15973	37.2797	51.449	15.9802	27.9585	54.3797	18.2624	9.34752	0.713797	12.6794	-1.06873	-0.329224	109.421	122.256	212.389	77.7715	4.62912	12.6029	-0.208813	-0.360697	4.93486	7.24592
NIM-G	Granite	2015-04-01			317.312	11.1912	142.187	287.418	54.9201	1.06246	38.3704	51.4901	16.0546	28.5937	55.457	19.0452	8.65061	-1.76383	13.8337	-1.17606	0.998	107.873	122.911	209.921	76.6475	8.6577	13.9819	1.14235	-0.0541174	6.25048	6.87117
NIM-G	Granite	2015-06-01			317.769	11.2852	142.387	287.55	54.957	1.21735	38.1461	52.1004	16.1033	28.6192	55.7095	19.3778	8.3652	-1.69148	16.0194	0.256533	-0.0340227	109.483	120.378	215.69	79.4422	5.03986	13.7223	1.20774	-0.500451	5.50593	7.16172
NIM-G	Granite	2015-08-01			317.184	10.8303	142.138	285.97	55.0093	1.02739	38.4259	52.1187	16.3323	28.1527	55.3229	18.3121	9.02015	0.106974	13.1515	-1.07227	0.341005	113.032	120.888	211.492	78.3933	4.59188	12.6947	-0.538231	0.303506	5.40796	7.26525
NIM-G	Granite	2015-09-30	AXRHT1496,97,98		317.142	11.0077	142.546	285.905	55.0169	0.967512	37.1967	50.9712	15.9233	28.4667	54.5958	17.8751	8.69156	0.581976	13.5683	-1.31503	0.242977	109.834	121.176	212.262	78.5551	6.43377	12.6172	1.34028	-0.596554	6.28867	8.42647
NIM-G	Granite	2015-11-30	AXRHT1514,15,16		317.58	11.2734	141.969	285.855	54.729	0.881391	38.0852	51.8559	16.0361	28.1938	55.0026	17.7779	8.89943	0.683404	13.9976	-1.9086	1.9483	107.839	121.829	208.8	77.9722	8.06964	12.526	1.1503	-0.607851	5.63591	7.3851
NIM-G	Granite	2016-01-31	AXRHT1538,39,40		317.085	10.7515	143.18	285.187	54.8547	0.85734	38.329	51.9692	16.4308	28.692	55.0991	18.0382	9.68207	0.0924943	13.1444	-0.841909	2.7072	109.516	124.167	205.784	76.2344	4.99011	12.7987	1.32228	0.384027	5.00023	7.36165
NIM-G	Granite	2016-07-31	AXRHT1544,45,46		317.722	11.3701	143.14	282.118	55.098	0.803913	38.3623	51.2792	16.4496	28.6705	55.6707	18.8917	9.4789	0.785399	14.1215	-1.07869	1.33871	108.3	123.592	210.683	77.4341	5.94653	13.0014	0.630992	-0.0899787	6.79027	7.94806
Avg.					317.291	11.1061	142.471	285.876	54.9459	0.997137	38.0244	51.6542	16.1638	28.4184	55.1547	18.4476	9.01693	-0.0614078	13.8145	-1.02559	0.901619	109.412	122.15	210.878	77.8063	6.04482	12.9931	0.755864	-0.190265	5.72679	7.45817
St.Dev					0.405749	0.223469	0.45852	1.73434	0.113181	0.147002	0.499419	0.419339	0.208674	0.278852	0.482995	0.587495	0.454147	1.06195	1.01611	0.605989	1.04843	1.66365	1.33755	2.90195	1.0394	1.57324	0.553966	0.736051	0.390407	0.658427	0.493816
RSD (%)					0.127879	2.01213	0.321835	0.606676	0.205986	14.7424	1.31342	0.811819	1.291	0.981237	0.875711	3.18468	5.03661	-1729.33	7.35541	-59.0867	116.284	1.52053	1.09501	1.37613	1.33588	26.0262	4.26353	97.3788	-205.192	11.4973	6.62115
MRG-1	Gabbro		Rec. values		8.5	266	14	108	20	0.87	10	0.93	0.24	17	191	134	193	87	430	526	55	51	9.8	28	19.2	0.57	0.7	0.86	0.194	3.6	0.3
MRG-1	Gabbro	2015-02-01			9.06152	273.966	13.6667	110.281	22.0362	2.62821	5.08629	1.74514	0.745201	18.1329	216.521	134.967	196.275	82.7704	482.035	567.837	57.222	51.0114	7.2981	28.4721	18.906	8.53041	1.19633	0.178802	0.202335	3.74442	-0.770669
MRG-1	Gabbro	2015-04-01			9.19998	274.354	13.6491	111.085	22.1281	2.45885	3.84315	0.880256	0.0343099	18.2155	216.415	135.638	196.177	88.6563	481.958	567.572	57.7505	50.9584	6.75513	33.2066	18.0627	2.4825	1.16889	0.530889	0.647009	1.52098	-1.47917
MRG-1	Gabbro	2015-06-01			9.50027	275.377	13.4293	109.864	21.9535	2.68977	4.31184	0.612684	0.453391	17.5605	214.34	136.98	198.027	85.0927	480.353	566.81	56.6447	50.9928	8.08074	32.3685	18.54	2.45582	1.52146	-1.08389	0.499637	4.5326	1.13059
MRG-1	Gabbro	2015-08-01			8.88341	276.735	14.1824	110.02	21.4915	2.49165	4.21776	0.528737	0.74933	17.6533	200.442	147.244	195.466	86.9698	483.504	573.08	57.4199	50.9712	5.09673	31.8521	17.3918	4.77289	0.637947	1.01768	0.07643	2.53616	-2.5415
MRG-1	Gabbro	2015-10-01	AXRHT1496,97,98		8.98459	276.022	13.4831	109.382	21.3767	2.61764	5.93567	0.91684	1.03629	17.438	202.607	145.492	194.517	87.0493	483.262	567.211	56.3987	51.025	10.0357	31.5021	18.0958	2.11769	0.441104	-0.781656	1.14783	3.80602	-2.33471
MRG-1	Gabbro	2015-11-30	AXRHT1514,15,16		9.09269	275.8	13.5357	110.01	21.6749	2.12526	6.15055	1.29762	0.688835	18.8433	201.796	145.979	193.045	87.0875	480.286	574.542	57.9989	50.9922	6.11422	27.2809	15.5762	3.66871	1.00063	0.188116	0.647248	1.86952	-0.864504
MRG-1	Gabbro	2016-01-31	AXRHT1538,39,40		9.05858	274.944	14.2332	110.113	21.4051	2.44198	4.82002	0.783826	0.583257	18.3942	202.043	145.721	194.982	83.7605	484.473	567.779	57.3364	50.9818	5.59613	32.8693	18.1097	3.59057	0.98171	0.307751	0.343005	2.67428	-0.961178
MRG-1	Gabbro	2016-07-31	AXRHT1544,45,46		9.02517	271.964	14.0162	109.591	22.813	4.51309	3.44363	0.485615	0.849667	17.9914	198.707	126.951	190.232	85.8527	483.16	569.145	57.784	51.0278	10.4905	34.9921	18.813	0.86856	0.191763	0.129267	0.208842	2.28925	-3.75044
Avg.					9.10078	274.895	13.7745	110.043	21.8599	2.74581	4.72611	0.90634	0.642535	18.0286	206.609	139.871	194.84	85.9049	482.379	569.247	57.3194	50.9951	7.4334	31.5679	17.9369	3.56089	0.89248	0.0608698	0.471541	2.87165	-1.44645
St.Dev					0.184888	1.48592	0.321526	0.510163	0.48261	0.734946	0.962511	0.427336	0.3003	0.47106	7.69669	7.31666	2.35971	1.94564	1.5033	2.92202	0.558854	0.0248949	1.98533	2.52961	1.06981	2.32665	0.438102	0.681641	0.345156	1.04968	1.46236
RSD (%)					2.03156	0.54054	2.33422	0.463602	2.20775	26.7661	20.3658	47.1496	46.7368	2.61284	3.72525	5.23099	1.2111	2.26487	0.311643	0.513313	0.974982	0.0488183	26.7083	8.01322	5.96429	65.339	49.0882	1119.83	73.1974	36.5531	-101.1
MA-N	Granite		Rec. values		3600	84	0.4	25	173	0.3	29	1.4	12.5	59	220	140	3	0.5	3	0.2	0.2	42	0.5	0.9	0.4	640	13	1.7	0	900	70
MA-N	Granite	2015-02-01			3612.67	86.4975	31.602	25.7073	164.755	-0.358037	29.05	1.42867	12.5113	57.8178	224.432	139.78	26.6141	-1.70676	6.18251	5.35036	-4.20937	57.7911	7.94823	10.8962	1.49632	639.642	12.5796	3.32317	1.08507	827.271	69.8614
MA-N	Granite	2015-04-01			3599.81	86.4197	33.5928	25.3925	164.794	-0.37411	29.0315	1.37061	12.5124	57.5664	224.051	139.255	26.4315	-1.72842	4.71102	4.55525	-2.4304	52.4071	6.13587	5.9313	-0.170857	639.718	13.1071	2.10236	0.973228	822.464	68.7572
MA-N	Granite	2015-06-01			3600.51	86.1178	30.9919	25.7269	164.797	-0.282505	29.021	1.44382	12.5055	57.6821	224.113	139.716	26.0609	-2.50008	5.04551	6.46717	-1.62758	55.5579	7.10329	6.0677	2.17798	639.811	12.8189	2.04212	0.57661	822.778	70.3456
MA-N	Granite	2015-08-01			3600.41	86.0745	28.1465	24.9957	165.152	-0.0273379	29.0433	1.42889	12.5298	58.0594	229.295	133.855	26.5994	-2.83083	5.48665	6.2017	-3.35666	52.1308	8.69075	11.6594	3.65556	639.771	13.0779	2.36205	0.799472	826.441	69.3283
MA-N	Granite	2015-10-01	AXRHT1496,97,98		3600.47	86.1478	29.1538	24.7978	164.697	-0.242032	28.9665	1.42838	12.4929	57.9548	229.638	134.311	26.1102	-1.01087	5.32963	5.84797	-2.80258	62.3737	6.03507	4.86161	-0.10044	639.894	12.9069	2.07131	1.34881	824.68	67.7974
MA-N	Granite	2015-11-30	AXRHT1514,15,16		3599.96	86.1999	29.7539	25.0862	165.328	-0.405977	28.9811	1.43658	12.5301	58.491	229.798	133.622	26.4297	-0.956139	5.93576	6.9636	-4.06341	53.4382	7.35592	8.32276	2.01552	639.592	12.5579	1.00874	0.886408	825.596	69.6581
MA-N	Granite	2016-01-31	AXRHT1538,39,40		3611.47	86.1479	1.26832	24.8417	165.216	-0.315411	28.9783	1.38135	12.499	57.612	229.663	134.52	26.6447	-0.493801	6.76773	4.95755	-3.00168	53.4587	7.79565	13.0814	5.16794	639.684	13.1314	-1.73459	1.69533	824.352	69.8312
MA-N	Granite	2016-07-31	AXRHT1544,45,46		3643.21	86.4729	0.0788705	23.306	164.692	-0.936012	28.9706	1.42629	12.499	57.784	229.987	142.873	27.0957	0.145828	6.4055	5.37205	-2.80631	55.4057	6.55748	9.3658	0.604711	639.661	12.7891	-1.72272	1.77802	824.382	69.485
Avg.					3608.56	86.2597	23.0735	24.9818	164.929	-0.367678	29.0053	1.41807	12.51	57.8709	227.622	137.241	26.4983	-1.38513	5.73304	5.71446	-3.03725	55.3204	7.20278	8.77326	1.85584	639.722	12.8711	1.18155	1.14287	824.745	69.383
St.Dev					14.9933	0.173457	13.9266	0.767467	0.258154	0.258072	0.0346434	0.0267509	0.0139382	0.300689	2.84331	3.56365	0.327979	1.0012	0.707769	0.806106	0.844648	3.41398	0.931425	2.99161	1.85038	0.0988927	0.226783	1.90221	0.42887	1.66256	0.788422
RSD (%)					0.415491	0.201087	60.3574	3.07211	0.156524	-70.1898	0.119438	1.88643	0.111417	0.519586	1.24914	2.59663	1.23774	-72.282	12.3454	14.1064	-27.8096	6.17128	12.9315	34.0992	99.7058	0.0154587	1.76195	160.992	37.5258	0.201584	1.13633
STM-1	Nepheline syenite		Rec. values		118	700	46	1380	268	5.2	17.7	31	9.06	36	235	4.6	3	0.9	4.3	8.7	0.61	560	150	259	79	1.54	4.6	1.66	0.0077	6.8	3.6
STM-1	Nepheline syenite	2015-02-01			116.94	713.899	42.7617	1378.42	257.6	5.37666	18.3064	30.4729	8.2044	36.9208	226.964	16.0043	5.9045	1.01306	8.53714	-0.384837	1.5182	579.756	145.069	253.197	77.0994	3.39233	6.07323	1.79006	-0.369187	7.65227	2.68102
STM-1	Nepheline syenite	2015-04-01			116.248	712.384	43.1926	1378.09	257.646	5.69653	17.6236	31.4285	8.20954	37.0289	227.408	15.2117	4.44566	4.07716	7.4714	-0.522927	1.55549	574.398	145.215	254.608	78.0757	4.95553	5.24646	1.21422	0.0835349	8.39746	4.14125
STM-1	Nepheline syenite	2015-06-01			116.423	713.818	43.1999	1380.58	258.458	5.60435	17.5788	30.7741	8.02264	36.9145	228.262	15.813	5.47299	3.45151	9.96437	-1.08767	0.343275	577.584	147.778	255.825	79.6082	2.6275	5.16109	0.829062	-1.00792	8.1593	1.93445
STM-1	Nepheline syenite	2015-08-01			116.793	714.683	42.9635	1375.49	257.94	5.66814	18.2195	31.8758	8.85839	37.1511	230.993	15.434	4.29334	3.91997	6.20668	-0.0331575	-0.404724	564.67	145.285	259.236	79.099	4.36342	5.76222	1.62641	0.645337	8.03271	3.06455
STM-1	Nepheline syenite	2015-10-01	AXRHT1496,97,98		116.63	712.063	43.0612	1375.94	258.055	5.57292	18.3271	31.4827	8.45134	36.8155	230.024	14.9096	4.80954	3.84993	7.70862	0.0290108	1.03816	574.61	146.97	254.86	77.5049	4.33473	5.88804	1.94948	-0.853124	8.11165	2.47589
STM-1	Nepheline syenite	2015-11-30	AXRHT1514,15,16		116.522	714.971	43.2471	1376.37	258.481	5.87935	17.5568	31.0798	7.38481	36.9469	230.338	14.5936	5.42581	3.15845	6.89741	-0.854337	0.815391	574.087	145.748	255.893	79.1999	4.83736	5.91374	0.124743	-0.928772	7.84718	2.75117
STM-1	Nepheline syenite	2016-01-31	AXRHT1538,39,40		116.717	713.357	43.0262	1375.89	257.603	5.97922	17.9171	31.5094	8.47336	36.6448	229.187	15.4508	5.70071	1.37629	8.39625	-0.51971	1.79386	575.237	146.383	256.262	80.8564	3.71453	5.71775	1.28008	-0.449258	7.59292	2.97819
STM-1	Nepheline syenite	2016-07-31	AXRHT1544,45,46		116.481	712.569	43.7001	1380.98	257.902	6.77263	17.804	31.4286	7.8194	36.8276	232.084	15.4439	5.92562	1.99421	8.05787	-1.14638	1.96751	571.476	146.907	253.472	78.5244	5.4456	5.13783	1.07901	-0.0152657	8.42723	2.45143
Avg.					116.594	713.468	43.144	1377.72	257.961	5.81872	17.9167	31.2565	8.17798	36.9062	229.407	15.3576	5.24727	2.85507	7.90497	-0.565001	1.0784	573.977	146.169	255.419	78.746	4.20888	5.61254	1.23663	-0.361832	8.02759	2.80974
St.Dev					0.221156	1.07003	0.273825	2.16107	0.356188	0.427413	0.328245	0.452896	0.448561	0.151059	1.78271	0.455634	0.646389	1.21807	1.13587	0.441893	0.804833	4.49514	0.992755	1.90366	1.21172	0.92068	0.373305	0.585054	0.575793	0.312434	0.642783
RSD (%)					0.18968	0.149976	0.634676	0.156858	0.138078	7.34547	1.83207	1.44897	5.48498	0.409304	0.777095	2.96683	12.3186	42.6635	14.3691	-78.2111	74.6325	0.783156	0.679182	0.745309	1.53877	21.8747	6.65127	47.3102	-159.133	3.892	22.8769
PCC-1	Peridotite		Rec. values		0.066	0.4	0.1	0.2	1	2	10	0.013	0.0045	0.7	42	10	2380	112	2730	31	8.4	1.2	0.052	0.1	0.042	0.0055	0.056	1.28	0.027	1.6	0.02
PCC-1	Peridotite	2015-02-01			2.59926	-0.117446	0.485432	1.57117	1.73263	0.427487	7.34018	-0.302621	0.43	1.11268	45.9471	25.7885	2381.83	113.171	2730.61	30.7512	8.83524	-0.411312	-0.199415	-2.37595	-0.291172	-3.96364	-0.44037	2.39994	0.0918719	1.05101	-8.58944
PCC-1	Peridotite	2015-04-01			2.64596	0.367801	0.557941	1.27876	1.83289	0.483927	7.64589	0.069295	0.184716	1.34939	45.9787	25.4204	2381.68	108.644	2730.67	29.4117	7.53204	-1.54357	-0.774336	-1.08932	-0.662786	-3.51853	-0.354716	0.956204	0.272327	0.262184	-9.32397
PCC-1	Peridotite	2015-06-01			2.59322	0.221472	0.435799	1.50976	1.64909	0.306452	7.71811	-0.45207	-0.505066	1.42236	46.746	26.2295	2381.45	110.49	2729.74	30.8705	8.70759	2.88302	0.307585	-5.39936	-0.762421	-3.18589	-0.164526	1.1944	-0.693176	0.573295	-8.42291
PCC-1	Peridotite	2015-08-01			2.7001	0.0476831	0.500605	0.59035	1.74409	0.334481	7.89311	0.0635436	0.308233	1.66817	45.4103	25.0288	2381.4	110.964	2729.16	29.7879	7.81597	-1.89582	1.25475	-4.61979	-0.737422	-2.1862	-0.53326	1.52245	-0.36346	0.603293	-8.6874
PCC-1	Peridotite	2015-10-01	AXRHT1496,97,98		2.58363	0.163865	0.530066	0.764976	1.86107	0.467473	7.14423	-1.10097	-0.671442	1.44355	45.6476	25.1154	2381.53	110.535	2730.33	29.7267	7.62433	3.84043	1.1686	-4.05764	-2.322	-2.60517	-0.180828	1.41897	-0.100855	0.86367	-9.5501
PCC-1	Peridotite	2015-11-30	AXRHT1514,15,16		2.79415	0.167542	0.710749	0.653852	1.82166	0.3225	7.63277	-0.644155	-0.00660976	0.990602	45.4269	24.0507	2382	110.642	2729.24	30.4233	8.09708	-0.0180443	0.80485	-4.75375	-0.795136	-2.61055	-0.421445	1.45926	0.152852	1.56768	-9.26976
PCC-1	Peridotite	2016-01-31	AXRHT1538,39,40		2.90222	0.167532	0.769925	0.314033	1.93558	0.274905	7.53092	-0.571844	-0.217755	1.84415	44.9335	24.2774	2381.9	113.399	2730.3	30.4113	8.39598	-4.69972	0.173714	-7.35847	-0.0751519	-0.660696	-0.0231367	1.74416	-0.120707	1.46866	-10.0766
PCC-1	Peridotite	2016-07-31	AXRHT1544,45,46		2.72876	0.633322	0.895551	-1.79961	1.71188	-0.111265	7.66466	-0.266985	0.340683	0.890109	45.9078	26.3578	2381.84	114.31	2730.6	30.9913	6.84721	-2.31603	0.252007	-2.86579	1.75322	-2.8994	-0.230676	0.764588	-0.0951642	-0.238781	-8.3324
Avg.					2.69341	0.206471	0.610759	0.610413	1.78611	0.313245	7.57123	-0.400726	-0.0171551	1.34013	45.7498	25.2836	2381.7	111.519	2730.08	30.2967	7.98193	-0.520129	0.37347	-4.06501	-0.486609	-2.70376	-0.29362	1.4325	-0.107039	0.768876	-9.03157
St.Dev					0.112281	0.2215	0.162213	1.07576	0.0928315	0.188312	0.233181	0.386467	0.41077	0.328549	0.535206	0.840758	0.221316	1.90574	0.618611	0.587287	0.663843	2.79014	0.686568	1.94772	1.12492	0.998732	0.171358	0.503095	0.307223	0.604051	0.618336
RSD (%)					4.16873	107.279	26.5593	176.235	5.19741	60.1167	3.07982	-96.4416	-2394.45	24.5163	1.16986	3.32531	0.00929233	1.70889	0.0226591	1.93845	8.31682	-536.431	183.835	-47.9144	-231.176	-36.9386	-58.3606	35.1201	-287.02	78.5629	-6.84639
BHVO-1	Basalt		Rec. values		9.52	399.2	26.23	174.6	18.5	1.1	2	1.2	0.42	21.3	105.1	137.2	120	44.9	287.6	313.8	31.4	134.4	15.4	38.1	24.8	0.13	0.56	0.15	0.074	2.1	0.2
BHVO-1	Basalt	2015-02-01			10.119	396.091	27.3016	181.004	19.5479	1.64747	2.08891	0.908364	0.652479	21.7189	123.505	162.458	125.881	45.8864	283.998	307.283	29.0954	133.733	13.3599	36.952	22.9556	0.487336	1.08134	0.774976	-0.0217678	2.08261	0.194431
BHVO-1	Basalt	2015-04-01			10.3044	396.562	26.8752	180.726	19.5758	1.61693	2.27386	1.00175	0.488564	21.7015	121.831	158.936	126.853	45.0011	282.914	309.883	29.609	141.005	14.1072	37.0885	24.2024	0.671525	1.1984	0.549156	-0.196367	1.23854	-1.26371
BHVO-1	Basalt	2015-06-01			10.2057	397.024	27.2205	181.313	19.4508	1.4012	3.93064	1.77098	1.00275	21.3772	121.894	160.251	126.267	43.6772	285.651	310.176	30.2017	137.244	12.219	37.7837	23.5139	0.793532	1.81589	-0.0176905	-0.0670563	2.6306	-0.772051
BHVO-1	Basalt	2015-08-01			10.6188	395.866	26.8715	179.101	19.5689	1.51657	3.08702	0.491995	0.945869	22.5027	124.084	157.796	127.428	46.193	282.489	308.445	30.5981	145.266	17.3229	42.3524	25.2896	3.15868	1.31645	-0.570239	-0.120564	1.77126	1.26408
BHVO-1	Basalt	2015-10-01	AXRHT1496,97,98		10.3941	396.817	27.1927	179.448	19.4206	1.73772	3.00646	1.54094	0.649724	22.3419	122.307	158.078	126.815	44.1961	285.265	310.057	30.8939	132.81	15.3698	41.5527	24.6969	1.08485	1.84893	-0.387733	-0.397139	-0.313419	-0.372516
BHVO-1	Basalt	2015-11-30	AXRHT1514,15,16		10.4621	395.564	27.1158	179.372	19.4417	1.26218	3.36254	0.943446	0.772063	21.3423	123.203	155.433	127.598	45.5337	284.774	308.732	30.636	142.186	14.8837	36.9269	24.4877	2.84034	0.590968	0.243775	0.493954	0.711708	-2.44565
BHVO-1	Basalt	2016-01-31	AXRHT1538,39,40		10.7118	397.062	28.2023	179.689	19.5874	1.84527	2.81634	1.5341	0.898975	22.1604	122.66	157.427	124.136	46.1142	283.646	310.929	28.8039	141.5	13.9091	40.042	22.7994	2.64743	1.27164	0.393557	0.249628	-0.0350562	-0.241164
BHVO-1	Basalt	2016-07-31	AXRHT1544,45,46		10.1789	397.201	27.6996	181.594	19.5569	1.44185	3.03896	1.6072	0.241186	19.9522	123.664	167.013	127.505	45.4617	281.58	309.987	29.4956	139.903	12.8265	37.3696	22.9707	1.93595	0.783397	0.129787	0.163908	1.85612	0.661309
Avg.					10.3744	396.524	27.3099	180.281	19.5187	1.55865	2.95059	1.22485	0.706451	21.6371	122.894	159.674	126.561	45.2579	283.79	309.437	29.9167	139.206	14.2498	38.7585	23.8645	1.70245	1.23838	0.139449	0.0130746	1.2428	-0.37191
St.Dev					0.213293	0.612601	0.445428	0.983512	0.0686289	0.190337	0.582878	0.448203	0.255388	0.803917	0.845635	3.61743	1.15261	0.911222	1.41514	1.18182	0.774838	4.29796	1.61151	2.22509	0.934167	1.07635	0.441734	0.45569	0.279691	1.04359	1.15497
RSD (%)					2.05597	0.154493	1.63101	0.545545	0.351605	12.2117	19.7546	36.5926	36.1508	3.71545	0.688104	2.26551	0.910717	2.0134	0.49866	0.381927	2.58999	3.08748	11.309	5.7409	3.91446	63.2236	35.6704	326.78	2139.19	83.9709	-310.551
G-2	Granite		Rec. values		168.5	474.9	9.88	319	12.02	0.38	30	24.5	1.96	23.3	83.5	10.98	3.46	4.47	7.88	35.1	3.66	1860	88.4	161.2	53.8	1.357	0.25	0.058	0.07	1.72	0.12
G-2	Granite	2015-02-01			167.278	472.376	9.69841	308.686	12.5577	0.445763	30.0469	23.6275	1.63121	22.3717	81.1346	14.2941	3.24377	3.05345	14.5224	35.5357	3.68177	1883.83	103.318	171.051	54.539	-4.58377	-0.524965	-0.523067	-0.82629	0.750424	-0.90931
G-2	Granite	2015-04-01			166.9	472.029	9.31479	309.049	12.3216	0.242664	29.9212	25.1577	2.34187	21.619	79.8644	14.0753	4.0343	3.61568	14.6602	35.9219	3.19688	1875.97	99.5712	165.849	54.909	-4.73949	-0.190175	-0.491765	-0.507695	0.617652	-0.848496
G-2	Granite	2015-06-01			166.843	470.79	9.41885	309.044	12.4615	0.618144	29.2199	23.9851	1.68334	22.0991	79.917	14.4573	2.922	3.43778	13.743	35.2238	4.70302	1878.92	99.8447	167.162	53.9481	-2.96757	-0.500363	0.156359	-0.467809	1.59313	-0.128239
G-2	Granite	2015-08-01			166.725	471.129	9.21479	307.407	12.196	0.306275	30.0511	24.0765	1.46804	22.848	81.79	13.8557	2.97261	2.21417	14.4191	34.8135	4.1064	1863.88	99.9097	166.422	55.146	-3.89803	0.411143	0.215578	-0.260017	2.35185	-1.0312
G-2	Granite	2015-10-01	AXRHT1496,97,98		167.103	471.754	9.63156	307.874	12.4345	0.477947	30.2534	25.2816	2.084	22.7842	81.1089	13.5925	2.72084	3.67028	14.4954	35.4748	3.43954	1880.38	102.487	168.209	56.5065	-4.56255	0.0984556	-0.138266	-0.13625	0.771337	0.103524
G-2	Granite	2015-11-30	AXRHT1514,15,16		167.129	470.946	9.43132	308.133	12.4153	0.642364	29.8106	23.7109	1.643	23.1076	81.5911	13.1669	3.3719	3.30889	14.5284	34.3644	3.59885	1868.57	100.455	169.504	54.1724	-5.73146	0.165338	-0.375803	-0.356756	0.447461	-0.183808
G-2	Granite	2016-01-31	AXRHT1538,39,40		167.226	470.993	8.28525	307.839	12.5064	0.400738	29.4695	24.7205	2.48612	23.6574	81.3801	13.7818	3.4531	5.69603	13.2666	37.1189	3.30141	1861.85	101.117	168.108	53.5329	-3.60984	-0.367462	0.599774	-0.114257	2.17825	-1.25442
G-2	Granite	2016-07-31	AXRHT1544,45,46		167.415	470.839	8.24964	310.216	12.6479	0.463676	29.4697	24.9188	2.03074	22.2017	80.9377	14.5016	2.9694	5.90972	15.9269	35.7102	3.50919	1869.32	102.142	166.761	53.2519	-5.45749	-0.158426	0.473313	-0.00953463	1.165	-1.34815
Avg.					167.077	471.357	9.15558	308.531	12.4426	0.449696	29.7803	24.4348	1.92104	22.5861	80.9655	13.9657	3.21099	3.86325	14.4452	35.5204	3.69213	1872.84	101.106	167.883	54.5007	-4.44377	-0.133307	-0.0104846	-0.334826	1.23439	-0.700012
St.Dev					0.23614	0.608375	0.569914	0.904319	0.139411	0.137495	0.357799	0.661366	0.369948	0.642953	0.717603	0.458555	0.41445	1.28226	0.769036	0.817543	0.492447	8.07357	1.39787	1.72655	1.03626	0.924226	0.335122	0.43582	0.264327	0.729125	0.553179
RSD (%)					0.141335	0.129069	6.22477	0.293105	1.12043	30.575	1.20146	2.70666	19.2577	2.84668	0.886307	3.28345	12.9072	33.1911	5.3238	2.30161	13.3377	0.431086	1.38258	1.02842	1.90136	-20.7982	-251.391	-4156.75	-78.9445	59.0677	-79.0242
GSP-1	Granodiorite		Rec. values		254	234	26	565	27.9	0.8	55	106	2.54	23	104	33	8.8	6.6	13	53	6.2	1310	184	399	196	1.02	0.1	3.2	0.069	6.6	0.3
GSP-1	Granodiorite	2015-02-01			257.835	237.544	25.5596	548.787	27.0647	1.81541	58.4042	95.4019	2.2729	22.5593	100.201	31.1801	9.98974	6.21065	8.83358	53.3042	5.62785	1287.57	134.093	316.299	146.228	1.7479	-1.02403	2.6711	-0.142248	8.09754	-0.678628
GSP-1	Granodiorite	2015-04-01			257.602	237.224	26.0606	549.175	27.1972	2.09035	58.181	95.3341	2.59046	22.2525	99.7157	30.7228	10.59	6.29865	7.66516	52.8063	5.63	1290.03	136.844	316.208	144.649	3.83277	0.051119	2.72184	-0.0300297	7.79492	-0.385238
GSP-1	Granodiorite	2015-06-01			257.873	236.974	25.3821	546.614	26.9869	1.8122	58.2208	95.992	2.1847	23.1573	98.6184	31.8268	11.0473	6.00833	7.80442	51.1015	6.5491	1285.95	136.207	318.934	146.166	2.5343	-0.645372	3.98879	-0.177415	6.62424	0.750199
GSP-1	Granodiorite	2015-08-01			257.792	238.165	25.9433	574.292	27.2023	2.04752	60.4353	97.1713	2.60171	22.5134	99.9415	36.0112	10.9143	8.59573	6.79208	52.569	6.72969	1315.97	139.574	326.033	151.99	2.13343	-1.007	4.26116	-0.876569	6.41244	-0.0111228
GSP-1	Granodiorite	2015-10-01	AXRHT1496,97,98		257.051	238.1	26.0458	573.184	27.1994	1.75003	59.5015	97.7961	2.20614	22.4385	101.405	36.1507	11.7737	6.05184	9.17468	51.0618	6.62125	1308.58	146.251	324.044	148.849	3.04473	-1.90264	3.42999	-1.03586	7.85179	-0.570381
GSP-1	Granodiorite	2015-11-30	AXRHT1514,15,16		256.975	237.263	25.677	569.862	26.9719	1.87615	58.9295	96.4473	1.92628	22.6909	101.157	34.5132	10.5779	7.1779	8.28887	50.9061	7.09985	1298.75	143.434	325.254	147.431	1.54457	-0.678922	3.54241	-0.64294	9.26652	-0.694761
GSP-1	Granodiorite	2016-01-31	AXRHT1538,39,40		258.713	238.824	24.3955	570.596	27.2278	2.16974	59.0984	97.1623	2.49742	21.4885	98.8761	35.1361	10.5738	7.14591	8.27287	50.8131	6.25921	1301.67	141.852	325.801	147.516	0.180501	-0.309389	1.45992	-0.351778	7.88798	-0.262971
GSP-1	Granodiorite	2016-07-31	AXRHT1544,45,46		257.855	237.101	24.3305	570.427	26.8186	2.41968	58.92	96.0265	2.06155	21.8532	100.893	38.9936	10.6023	6.35811	7.78054	51.7309	7.68385	1318.45	144.331	327.893	152.339	2.15402	1.36283	3.03848	-0.0412456	9.10215	0.367873
Avg.					257.712	237.649	25.4243	562.867	27.0836	1.99763	58.9614	96.4164	2.29264	22.3692	100.101	34.3168	10.7586	6.73089	8.07652	51.7866	6.5251	1300.87	140.323	322.558	148.146	2.14653	-0.519175	3.13921	-0.41226	7.8797	-0.185629
St.Dev					0.542859	0.648795	0.696853	12.263	0.148158	0.22756	0.75154	0.891501	0.248797	0.512945	1.02296	2.87283	0.513926	0.880692	0.740984	0.976584	0.697103	12.641	4.33669	4.67786	2.76681	1.08149	0.953149	0.882461	0.391543	1.01434	0.522181
RSD (%)					0.210646	0.273005	2.74089	2.17866	0.547039	11.3915	1.27463	0.924636	10.852	2.29309	1.02193	8.3715	4.77687	13.0843	9.17454	1.88578	10.6834	0.971731	3.0905	1.45024	1.86762	50.3831	-183.589	28.1109	-94.9746	12.8728	-281.304
BIR-1	Basalt	Jochum	Rec. values		0.21	108.6	15.6	14.8	0.55	0.068	3	0.03	0.01	15.46	70.4	120.7	168.9	52.2	392.9	320.6	43.21	6.75	0.627	1.92	2.39	0.005	0.17	0.46	0.018	0.65	0.027
BIR-1	Basalt	2015-02-01			2.71026	108.642	16.6884	15.7576	2.87127	1.17075	3.02146	0.0422228	0.62823	15.9919	69.9451	129.205	171.243	50.1088	382.897	321.865	39.7566	19.3962	2.20824	-0.543002	1.3009	-4.12516	-0.0541594	0.500701	-1.41091	-2.22929	-1.27795
BIR-1	Basalt	2015-04-01			2.82097	109.171	16.9087	15.4935	2.53415	0.759689	4.00338	-0.266563	0.164807	15.9005	70.18	128.666	172.769	50.7918	383.921	316.84	39.0199	20.2302	2.42164	-0.549063	0.975264	-0.988002	0.115313	1.10612	-0.798703	0.433559	1.10809
BIR-1	Basalt	2015-06-01			2.42284	109.51	17.1555	15.5977	2.40011	0.738883	2.86248	0.112546	0.557061	17.1345	68.7874	128.148	171.055	54.5085	381.624	320.352	40.4588	16.7535	-0.662381	3.63303	3.65065	-2.95414	0.0852884	1.05828	-0.189636	-0.551243	-2.35806
BIR-1	Basalt	2015-08-01			2.45372	109.368	16.5569	14.5426	2.60285	0.653726	2.50707	-0.243059	-0.358229	15.2406	68.1953	124.038	174.379	50.963	381.507	319.074	38.2839	19.4674	-1.48417	-0.420755	2.49799	-3.40641	0.379216	0.402382	-0.265516	0.535035	-2.38185
BIR-1	Basalt	2015-10-01	AXRHT1496,97,98		2.60083	109.594	16.9337	14.5016	2.86635	0.859372	3.3811	0.123137	0.0158942	15.9394	69.7109	124.189	173.748	51.6059	382.815	320.268	40.3896	17.0772	-2.14746	-1.29074	1.31161	0.186831	0.0739173	0.376466	0.157979	-0.369085	-0.940832
BIR-1	Basalt	2015-11-30	AXRHT1514,15,16		2.83988	109.042	16.9061	14.8315	2.54254	0.930268	2.21683	-0.0118981	0.414376	15.4619	68.7537	124.188	171.877	53.0311	385.57	318.531	38.889	17.2057	-0.0586725	5.82269	3.81846	1.84235	0.50393	1.00722	-0.371154	0.636028	-1.72578
BIR-1	Basalt	2016-01-31	AXRHT1538,39,40		2.90687	109.013	17.4966	14.4138	2.41939	0.67527	2.9779	0.148917	0.62808	15.5911	69.4748	124.93	171.706	52.9554	381.537	318.656	39.6394	16.9435	-1.09617	4.26584	1.84203	-1.00467	0.239309	-0.638658	-0.111895	-0.49103	-1.80147
BIR-1	Basalt	2016-07-31	AXRHT1544,45,46		3.083	109.555	17.8466	13.452	2.28015	0.461474	3.16744	-0.00378915	-0.0797823	16.0143	68.9144	133.169	173.594	50.4222	386.14	318.456	39.3405	19.5371	-2.868	1.52826	2.48	-2.77258	-0.251197	0.269114	-0.0426663	0.597069	-2.3419
Avg.					2.7298	109.237	17.0616	14.8238	2.5646	0.781179	3.01721	-0.0123109	0.246305	15.9093	69.2452	127.067	172.546	51.7983	383.251	319.255	39.4722	18.3263	-0.460872	1.55578	2.23461	-1.65272	0.136452	0.510203	-0.379062	-0.179869	-1.46497
St.Dev					0.228031	0.331008	0.426306	0.770203	0.212816	0.211129	0.541674	0.160742	0.367999	0.569292	0.686207	3.29182	1.255	1.54456	1.81712	1.53217	0.74622	1.45107	1.91703	2.69156	1.07618	2.02122	0.238487	0.574473	0.501797	0.973018	1.16612
RSD (%)					8.35341	0.303019	2.49863	5.19573	8.29821	27.027	17.9528	-1305.69	149.408	3.57836	0.990982	2.59063	0.727339	2.98187	0.474132	0.479919	1.89049	7.91795	-415.957	173.003	48.1596	-122.297	174.777	112.597	-132.378	-540.96	-79.6006
BCR-1	Basalt	Jochum	Rec. values		46.6	334.9	36.91	190.3	12.74	1.51	13.44	5.79	1.67	22.19	128.5	19.6	11.68	37.55	13.5	404.4	32.41	683.3	25.46	53.94	28.68	0.96	0.6	0.63	0.088	2.44	0.43
BCR-1	Basalt	2015-02-01			49.1443	334.115	37.5646	198.538	13.6356	1.95941	13.574	5.79184	1.89223	22.7925	123.078	42.3418	11.9524	39.2376	36.7542	399.007	30.2008	728.345	28.2531	57.0931	29.0249	0.958554	0.860594	1.26253	-0.151102	-0.946172	2.17034
BCR-1	Basalt	2015-04-01			48.9661	333.739	37.653	198.533	13.6411	2.29804	13.6841	5.91194	1.88988	22.7311	123.619	42.0677	11.5638	40.1619	36.9675	400.008	29.837	719.961	24.4672	60.3282	29.0301	-2.29111	1.06461	-0.474282	0.364085	2.21602	-0.043483
BCR-1	Basalt	2015-06-01			49.0444	333.685	37.423	198.951	13.9804	2.42975	14.1085	6.5317	1.92931	22.3584	125.372	43.1145	10.633	39.9844	35.2857	396.299	30.4613	723.388	27.3442	56.3375	28.3475	-0.0962239	0.362203	-0.0891988	-0.389165	0.821658	0.289522
BCR-1	Basalt	2015-08-01			48.7437	333.656	37.8854	197.524	13.5691	2.19468	13.395	7.05717	2.00525	22.623	126.708	41.0172	11.2506	38.9908	35.6999	399.62	29.3156	731.467	24.2244	58.3902	28.0575	0.201981	1.35611	0.454387	0.502856	2.20965	-0.746273
BCR-1	Basalt	2015-10-01	AXRHT1496,97,98		49.1444	333.72	37.639	197.397	13.8263	2.09247	14.0602	6.53498	1.9359	22.4496	125.627	40.2022	11.6028	39.0045	32.2546	397.321	28.6268	715.142	25.037	57.558	26.983	-0.855891	1.31395	-0.00405133	0.155594	1.18783	1.34662
BCR-1	Basalt	2015-11-30	AXRHT1514,15,16		48.7683	335.031	37.9402	198.177	13.6142	2.44511	14.0101	6.5107	2.1776	23.9327	125.472	40.0362	11.1385	37.5929	34.0238	398.359	28.4107	723.359	22.8849	56.1144	28.9992	-1.7401	1.53737	-0.565351	-0.416766	2.02474	1.47173
BCR-1	Basalt	2016-01-31	AXRHT1538,39,40		48.641	334.042	38.2533	196.986	13.3506	2.06211	13.8304	5.81189	1.60353	23.1423	125.45	41.2738	12.2501	36.4777	36.251	398.394	30.0172	717.68	25.1786	59.6905	27.2531	-2.22646	1.33141	-0.380603	-0.285115	2.50058	-0.494075
BCR-1	Basalt	2016-07-31	AXRHT1544,45,46		48.7197	334.979	38.8407	198.424	13.5641	1.97042	13.6446	6.08029	1.65492	23.4301	124.327	43.8247	12.0546	35.6714	34.5061	397.376	30.006	708.827	25.9123	55.6531	28.2912	-0.739385	0.302478	-0.792955	0.0412541	0.779452	1.53789
Avg.					48.8965	334.121	37.8999	198.066	13.6477	2.1815	13.7884	6.27881	1.88608	22.9325	124.957	41.7348	11.5557	38.3902	35.2178	398.298	29.6094	721.021	25.4127	57.6456	28.2483	-0.84858	1.01609	-0.0736902	-0.0222948	1.34922	0.691534
St.Dev					0.202077	0.571072	0.459916	0.683483	0.187228	0.193072	0.256224	0.450135	0.183948	0.535945	1.18999	1.34759	0.53575	1.63978	1.5784	1.25285	0.750205	7.26414	1.72957	1.70174	0.794415	1.17848	0.468864	0.663668	0.345713	1.14465	1.07676
RSD (%)					0.413276	0.170918	1.2135	0.345078	1.37187	8.85042	1.85826	7.16911	9.75294	2.33706	0.95232	3.22893	4.63623	4.27134	4.48183	0.314551	2.53367	1.00748	6.80591	2.95207	2.81226	-138.877	46.1439	-900.62	-1550.64	84.8374	155.706
JSd-1	Stream sediment		Rec. values		67.4	340	14.8	132	11.1	0.5	12.9	4.44	1	17.2	96.5	22.2	7	11.2	22	76	10.9	520	18.6	34.4	17.8	2	2.42	0.5	0.1	2.77	0.5
JSd-1	Stream sediment	2015-02-01			65.4279	331.569	14.9889	126.36	12.0768	0.395314	13.3323	3.47562	0.583948	15.9508	90.029	25.1552	7.16695	12.5285	20.2153	80.6789	11.4408	537.525	14.0449	28.504	15.802	-0.174948	2.43387	0.262112	-0.164503	2.35315	-1.02986
JSd-1	Stream sediment	2015-04-01			65.5788	331.428	14.8401	126.126	12.2416	0.520639	12.6324	3.86243	1.13146	15.6409	88.4608	24.6898	6.9141	11.6572	20.8268	80.322	10.3327	541.921	15.6334	29.4791	17.7967	-0.416533	1.30093	0.412589	0.559451	1.90915	-0.188467
JSd-1	Stream sediment	2015-06-01			65.4712	331.456	14.6289	126.079	12.2044	0.525187	12.8527	3.59699	0.759569	14.9092	88.4903	24.5357	6.83558	11.6887	21.241	79.8769	11.1074	542.653	16.126	26.7835	14.7786	1.58277	2.11255	0.465405	0.409467	1.24942	-0.370541
JSd-1	Stream sediment	2015-08-01			65.7685	331.186	14.7765	124.847	12.2945	0.617852	12.1435	3.21705	0.56404	16.438	89.4462	24.0402	5.75256	12.6337	20.7984	77.9438	11.1663	527.383	13.9744	27.3056	14.5512	-2.04481	1.5451	-0.253416	0.178354	1.41596	0.675782
JSd-1	Stream sediment	2015-10-01	AXRHT1496,97,98		65.8428	331.362	15.0581	124.748	12.0935	0.459562	12.2333	3.52472	0.680087	16.2099	89.8629	23.839	6.41724	12.9958	19.8265	79.3984	10.7211	536.224	13.776	28.841	15.5006	1.84121	2.94192	1.34883	-0.405955	1.17699	-0.287499
JSd-1	Stream sediment	2015-11-30	AXRHT1514,15,16		65.386	331.047	14.8238	125.146	12.109	0.756319	12.596	3.74908	0.946532	15.6716	89.6967	23.4361	7.19573	11.6008	19.2927	80.1129	10.2239	530.397	17.014	27.6625	16.0725	0.153437	2.40899	-0.204097	-0.711187	1.58483	-0.0510856
JSd-1	Stream sediment	2016-01-31	AXRHT1538,39,40		65.2566	331.914	15.0501	125.589	12.276	0.603436	12.7524	3.66975	0.83183	15.8177	89.1302	24.2274	7.50452	12.0888	19.4405	79.9815	11.0116	538.646	15.7102	28.3942	16.361	-0.686214	2.61957	0.237442	0.298545	1.34575	-0.486242
JSd-1	Stream sediment	2016-07-31	AXRHT1544,45,46		65.9436	330.992	15.3534	126.472	12.0592	0.372424	12.4794	3.53761	0.857843	15.8235	90.041	25.4012	7.06781	12.4808	19.9419	80.2662	10.8245	542.774	15.497	23.4222	14.2711	-0.327435	2.3147	1.08441	0.933271	0.648459	-0.289405
Avg.					65.5844	331.369	14.94	125.671	12.1694	0.531342	12.6277	3.57916	0.794413	15.8077	89.3946	24.4156	6.85681	12.2093	20.1979	79.8226	10.8535	537.19	15.222	27.549	15.6417	-0.00906487	2.2097	0.41916	0.13718	1.46046	-0.253415
St.Dev					0.243148	0.299389	0.222422	0.686787	0.0953048	0.126694	0.373341	0.194263	0.190419	0.452552	0.642884	0.662932	0.546603	0.525758	0.701119	0.845292	0.417176	5.71849	1.16769	1.87881	1.14676	1.2468	0.545389	0.56157	0.537146	0.50893	0.475367
RSD (%)					0.37074	0.0903492	1.48877	0.546497	0.783153	23.8441	2.95651	5.42761	23.9697	2.86286	0.719152	2.7152	7.97168	4.30621	3.47125	1.05896	3.84369	1.06452	7.67109	6.81988	7.3314	-13754.2	24.6815	133.975	391.562	34.8472	-187.584
JSd-2	Stream sediment		Rec. values		26.9	202	17.4	111	4.56	11.5	146	2.33	1.1	15.3	2056	1114	92.8	48.4	108	124	17.5	1199	11.3	23.4	13.2	1.1	38.6	11.6	18.8	32.5	4.7
JSd-2	Stream sediment	2015-02-01			27.7464	203.485	19.2891	114.367	5.66831	14.5746	150.986	4.7469	1.29567	14.6748	2055.91	1119.83	101.153	49.1275	109.253	139.091	19.2259	1116.3	9.04432	20.5775	8.9651	-5.80974	39.3255	12.1955	22.7433	37.1948	3.35109
JSd-2	Stream sediment	2015-04-01			27.5857	203.287	19.335	114.173	5.64138	14.6183	149.476	3.48758	1.16854	14.1618	2055.98	1119.55	99.1754	48.3305	110.45	140.225	19.2474	1129.81	9.84192	20.9646	8.87605	-4.62052	38.6369	12.1802	22.9249	36.547	0.988011
JSd-2	Stream sediment	2015-06-01			27.9787	203.79	19.4639	115.065	5.89173	14.5484	149.486	3.5351	1.71769	14.2745	2055.89	1120.39	100.859	49.936	112.325	139.382	18.9428	1119.25	10.0849	18.9178	7.94453	-6.8519	39.4187	11.4982	22.5303	37.8694	2.57237
JSd-2	Stream sediment	2015-08-01			27.8861	202.993	19.6649	113.454	5.81237	14.8813	147.964	3.30015	0.532732	13.988	2055.94	1120.58	101.253	47.8881	109.203	138.823	19.9318	1104.94	11.8477	17.3572	7.93161	-2.8579	39.6363	12.1161	22.2618	36.0605	1.47301
JSd-2	Stream sediment	2015-10-01	AXRHT1496,97,98		27.7321	203.093	19.2089	113.421	5.64028	14.5912	148.541	4.01537	1.45899	14.2376	2056	1120.05	99.8154	49.4526	109.798	140.956	18.5839	1106.41	9.21883	18.0596	7.12053	-2.36751	40.3134	12.8652	22.4257	37.4331	1.10451
JSd-2	Stream sediment	2015-11-30	AXRHT1514,15,16		27.7189	203.159	18.9497	113.001	5.79749	14.5809	148.659	4.51565	1.25362	14.569	2055.99	1119.62	100.941	48.3125	108.105	141.09	16.9965	1116.7	10.819	18.4921	8.60637	-5.11673	41.0471	12.9228	21.0635	37.0015	2.75707
JSd-2	Stream sediment	2016-01-31	AXRHT1538,39,40		27.6433	203.236	19.8516	113.052	5.91751	14.5487	148.876	3.24081	0.450671	14.7093	2055.91	1120.5	100.906	47.616	110.451	139.012	17.601	1126.98	12.0908	18.8433	11.3385	-3.82443	39.0531	13.3702	21.2334	35.6587	3.47482
JSd-2	Stream sediment	2016-07-31	AXRHT1544,45,46		28.0198	202.886	19.4827	113.27	5.65656	14.4228	149.412	3.68128	1.72423	16.1682	2055.93	1120.49	100.728	45.9838	107.384	136.621	17.0719	1108.67	9.23509	18.9558	11.1184	-2.80624	42.7269	11.4301	20.7525	36.8071	1.6755
Avg.					27.7889	203.241	19.4057	113.725	5.7532	14.5958	149.175	3.81535	1.20027	14.5979	2055.94	1120.13	100.604	48.3309	109.621	139.4	18.4502	1116.13	10.2728	19.021	8.98765	-4.28187	40.0197	12.3223	21.9919	36.8215	2.17455
St.Dev					0.156392	0.287644	0.277896	0.732531	0.115541	0.129349	0.906301	0.560317	0.482501	0.684694	0.0404269	0.419529	0.724133	1.23551	1.5274	1.42721	1.0972	9.1827	1.19533	1.20824	1.50782	1.59599	1.32596	0.687353	0.841723	0.722183	0.990425
RSD (%)					0.562785	0.141529	1.43203	0.644123	2.0083	0.886212	0.607543	14.6859	40.1995	4.69035	0.00196634	0.0374538	0.719787	2.55636	1.39334	1.02382	5.94682	0.822726	11.6359	6.35216	16.7766	-37.2733	3.31327	5.57812	3.82741	1.96131	45.5463
JSd-3	Stream sediment		Rec. values		285	58.7	14.9	124	7.8	1.6	82.1	9.7	1.7	13.5	136	426	19.6	12.7	35.3	72	10.5	462	19.8	42	15.7	30.6	252	2.3	1.29	195	179
JSd-3	Stream sediment	2015-02-01			278.123	55.5158	16.626	126.974	8.85053	1.48356	79.8211	10.6141	1.18607	14.1027	125.849	357.303	20.8577	14.1598	32.2312	76.6369	12.7569	479.243	20.5124	47.4912	16.3921	30.4949	252.067	1.85234	0.633314	196.53	128.725
JSd-3	Stream sediment	2015-04-01			277.798	55.5996	16.5785	126.533	8.55802	1.49332	80.9088	10.5048	1.77669	12.9395	125.522	358.014	20.6767	12.7616	33.8323	76.5248	10.4407	477.572	20.7123	45.9776	16.0107	31.7297	252.281	1.80766	0.133405	197.218	129.502
JSd-3	Stream sediment	2015-06-01			277.686	55.2563	16.7405	126.783	8.80048	1.41948	80.256	10.5039	1.97762	12.8299	127.261	356.755	20.8304	13.1907	30.4358	77.0153	10.057	476.647	19.8309	40.9224	14.1957	31.3982	251.98	2.11101	0.809961	197.214	131.015
JSd-3	Stream sediment	2015-08-01			278.144	55.497	16.1587	125.475	8.82635	1.52718	80.4159	10.7282	1.8947	12.7355	127.963	347.499	19.7811	12.6169	31.2787	76.1067	10.3192	474.882	21.4964	49.7474	17.4314	32.1073	252.09	1.5376	0.530372	196.645	129.852
JSd-3	Stream sediment	2015-10-01	AXRHT1496,97,98		278.082	55.1874	16.4662	126.109	8.7786	1.66248	79.743	10.569	1.90341	13.4391	126.807	348.065	19.4981	13.2216	31.0254	76.5224	11.4505	476.682	20.6985	49.5955	18.2294	32.0579	251.83	2.89972	0.391175	198.327	129.542
JSd-3	Stream sediment	2015-11-30	AXRHT1514,15,16		278.024	55.2951	16.3027	125.819	8.7842	1.60659	80.0713	10.5067	1.89486	13.4016	129.436	346.874	20.3712	12.7873	29.3356	75.7024	9.9918	472.815	20.1012	46.7456	17.6094	31.7772	251.694	2.48976	0.683034	197.751	128.944
JSd-3	Stream sediment	2016-01-31	AXRHT1538,39,40		278.009	55.2589	14.566	125.661	8.71532	1.41293	80.4122	10.7424	1.93181	13.0415	127.823	348.615	20.5431	12.066	29.5815	76.3923	10.9327	472.47	22.6667	47.076	17.6387	33.7035	252.237	0.97531	0.823036	197.226	130.163
JSd-3	Stream sediment	2016-07-31	AXRHT1544,45,46		277.29	55.5644	15.1072	123.307	8.67864	1.11005	80.5919	10.4219	1.42337	12.9994	127.991	364.717	19.9865	13.1867	30.7396	75.6063	8.94175	473.548	19.404	52.5003	19.6414	30.9159	251.084	0.148488	0.37891	197.655	132.416
Avg.					277.895	55.3968	16.0682	125.833	8.74902	1.46445	80.2775	10.5739	1.74857	13.1862	127.332	353.48	20.3181	12.9988	31.0575	76.3134	10.6113	475.483	20.6778	47.507	17.1436	31.7731	251.908	1.72774	0.547901	197.321	130.02
St.Dev					0.29219	0.163153	0.79509	1.15322	0.0953314	0.166832	0.391272	0.114114	0.286786	0.446756	1.26802	6.59599	0.508	0.607876	1.45199	0.479267	1.13414	2.43759	1.02311	3.397	1.62573	0.958433	0.385897	0.863495	0.237597	0.588269	1.20202
RSD (%)					0.105144	0.294517	4.94822	0.91647	1.08962	11.3921	0.487399	1.07921	16.4012	3.38807	0.995842	1.86602	2.50023	4.67639	4.67516	0.628025	10.688	0.512656	4.94788	7.15053	9.483	3.0165	0.15319	49.9784	43.365	0.298128	0.924492
BE-N	Basalt		Rec. values		47.61	1392	29.44	272.9	113.2	2.75	4.1	10.58	2.44	17.2	122.9	68.8	269.7	59	353.1	231.9	22.55	1039	82.55	153	66.35	0.729	1.91	0.269	0.1	1.68	28
BE-N	Basalt	2015-02-01			44.2852	1386.43	28.8991	274.566	107.954	2.22502	4.95537	10.5725	2.40983	16.5454	117.875	75.3494	274.211	61.2193	332.505	235.537	22.693	1084.89	85.6742	155.75	66.9696	3.85991	3.55862	-0.360133	0.11066	0.650199	27.1615
BE-N	Basalt	2015-04-01			44.7881	1387.3	28.5427	275.531	108.614	1.81509	4.06081	10.5667	2.39254	17.7083	118.968	74.8742	274.925	61.3792	332.2	236.949	24.0929	1088.9	88.8499	151.873	63.8241	3.43021	4.459	1.50929	-1.47509	0.633684	29.4295
BE-N	Basalt	2015-06-01			44.5191	1386.62	28.6878	275.01	108.399	2.09525	4.07906	10.6144	2.35868	17.7287	119.642	75.9053	276.264	59.3078	331.861	237.296	23.1506	1088.11	87.7438	155.107	64.2205	2.72303	4.62643	-0.648757	-0.541739	0.728928	28.1203
BE-N	Basalt	2015-08-01			44.5468	1386.08	28.1918	271.354	108.716	2.10689	4.10727	10.6322	2.43688	17.9377	118.604	72.5264	275.817	58.987	334.017	237.346	23.1789	1094.27	88.6322	152.875	66.5135	1.51139	4.66548	-1.39094	-1.17775	0.856926	29.7585
BE-N	Basalt	2015-10-01	AXRHT1496,97,98		44.5579	1387.05	28.72	272.185	108.252	1.99451	4.05143	10.5984	2.40389	16.4363	119.459	72.5045	276.58	59.8322	330.945	236.826	23.7167	1088.28	88.0772	158.619	65.9974	2.4099	4.10985	-0.757398	-0.173976	2.69978	27.8158
BE-N	Basalt	2015-11-30	AXRHT1514,15,16		44.7308	1386.13	28.8644	272.615	108.174	1.9942	4.06756	10.6201	2.43846	16.6482	117.824	72.1623	273.884	58.8494	332.555	237.749	23.7073	1095.31	88.5421	156.825	63.5212	-3.22625	4.72276	0.345528	0.202619	-0.178897	28.6735
BE-N	Basalt	2016-01-31	AXRHT1538,39,40		44.2597	1386.48	29.106	275.828	108.423	1.99094	4.10861	10.628	2.43751	16.2136	120.157	73.4517	275.083	60.2113	331.634	236.941	25.6854	1106.03	84.6933	157.539	64.4134	0.373367	4.32699	0.695877	-0.244301	1.96635	27.8937
BE-N	Basalt	2016-07-31	AXRHT1544,45,46		44.1771	1387.75	29.2718	287.976	108.607	1.67312	4.14835	10.6007	2.44436	16.5344	118.238	77.1668	276.171	59.188	330.785	240.363	24.7251	1082.95	87.9132	158.014	66.1059	1.99273	4.60383	1.40813	-0.286793	2.09434	29.1825
Avg.					44.4831	1386.73	28.7855	275.633	108.392	1.98688	4.19731	10.6041	2.41527	16.9691	118.846	74.2426	275.367	59.8718	332.063	237.376	23.8687	1091.09	87.5157	155.825	65.1957	1.63429	4.38412	0.1002	-0.448297	1.18141	28.5044
St.Dev					0.222971	0.587414	0.334591	5.25398	0.256566	0.173594	0.307933	0.0243944	0.0298178	0.695666	0.858586	1.84619	0.995367	0.986966	1.02693	1.3694	0.964149	7.34333	1.51008	2.43129	1.34179	2.24639	0.390306	1.05851	0.594525	0.963452	0.90356
RSD (%)					0.501248	0.0423596	1.16236	1.90615	0.236702	8.73704	7.33644	0.230046	1.23456	4.09962	0.722436	2.4867	0.361469	1.64847	0.309258	0.57689	4.03938	0.673025	1.7255	1.56027	2.0581	137.454	8.90274	1056.39	-132.619	81.5508	3.1699
JR-1	Rhyolite		Rec. values		257	29.1	45.1	99.9	15.2	3.3	19.3	26.7	8.9	16.1	30.6	2.7	1.7	0.8	2.8	7	5.1	50.3	19.7	47.2	23.3	20.8	16.3	1.2	0.006	2.9	1.6
JR-1	Rhyolite	2015-02-01			249.036	26.9844	45.7879	101.937	16.362	2.17003	17.292	26.5783	8.10424	15.0202	29.496	3.50421	4.77156	-0.460852	-0.453548	4.56651	5.84022	44.115	20.645	44.5631	24.6956	22.7267	15.479	0.20761	-0.92011	2.79079	4.12273
JR-1	Rhyolite	2015-04-01			248.921	26.9438	46.0365	102.02	16.7248	2.14651	18.387	27.1008	7.89862	15.8424	29.1992	3.19092	4.95041	-0.942734	0.789872	5.86125	5.54991	45.1878	20.9506	46.5175	25.6995	21.3485	15.0223	1.16063	-0.362552	2.4377	3.6273
JR-1	Rhyolite	2015-06-01			249.082	26.3492	45.9292	102.327	16.4745	2.23693	17.6559	26.5627	7.79789	15.1456	29.2785	3.82061	4.72415	-0.190375	-1.00704	3.52578	5.55402	44.3106	21.5248	47.0375	27.0206	20.5214	15.867	2.16939	0.053791	2.12823	4.42679
JR-1	Rhyolite	2015-08-01			248.995	26.5336	45.6707	101.406	16.6941	2.245	17.4492	26.3167	7.82316	15.1918	28.3765	5.06746	5.21491	-1.69156	5.02221	5.53457	5.03763	47.1202	19.9562	47.4415	25.4239	18.5096	14.8677	1.39796	-0.60807	2.19937	4.03468
JR-1	Rhyolite	2015-10-01	AXRHT1496,97,98		248.045	26.5279	46.0464	100.885	16.6709	2.33025	17.5755	26.4312	7.94623	15.7876	29.5325	4.59012	5.77006	-2.15905	3.1679	5.36273	5.02034	53.8688	22.0486	44.1164	25.2239	17.2786	14.7949	1.37688	-0.0614427	3.04494	4.91731
JR-1	Rhyolite	2015-11-30	AXRHT1514,15,16		248.21	26.3811	45.8815	100.987	16.6623	2.20285	18.067	26.3496	7.87455	15.1224	28.5438	4.4086	5.92119	-1.01208	5.1216	5.15489	4.39559	47.6953	20.902	46.1518	24.2049	19.1911	14.8271	1.63092	-0.0787268	2.94561	3.91887
JR-1	Rhyolite	2016-01-31	AXRHT1538,39,40		248.398	26.5861	44.7835	100.815	16.7484	2.27251	18.0789	26.5422	7.5983	14.5527	29.6908	5.08739	5.53976	0.26533	4.21636	5.32409	3.45142	46.6631	22.1306	43.6909	26.5501	20.3712	15.249	2.85704	-0.0428293	3.61586	3.44883
JR-1	Rhyolite	2016-07-31	AXRHT1544,45,46		248.52	27.3856	44.9737	98.0318	16.5078	1.72217	18.5459	26.8779	8.61482	15.9176	28.6377	4.13218	5.33356	-0.872129	4.05789	5.06462	5.1018	49.518	23.3256	44.4989	21.6379	22.173	14.7551	0.864399	0.16682	2.08551	3.83046
Avg.					248.651	26.7115	45.6387	101.051	16.6056	2.16578	17.8814	26.5949	7.95723	15.3225	29.0944	4.22519	5.2782	-0.882931	2.6144	5.04931	4.99387	47.3099	21.4354	45.5022	25.0571	20.265	15.1078	1.4581	-0.23164	2.656	4.04087
St.Dev					0.408531	0.359433	0.487662	1.34595	0.139391	0.188352	0.45502	0.268452	0.301574	0.480048	0.504392	0.695031	0.447525	0.781848	2.47548	0.720525	0.764444	3.21169	1.05372	1.44718	1.65644	1.85568	0.396423	0.802473	0.370534	0.539154	0.463608
RSD (%)					0.164299	1.34561	1.06853	1.33195	0.839423	8.69674	2.54466	1.00941	3.78993	3.13295	1.73364	16.4497	8.47874	-88.5515	94.6861	14.2698	15.3077	6.78862	4.91577	3.18047	6.61069	9.15706	2.62397	55.0354	-159.961	20.2995	11.473
JR-2	Rhyolite		Rec. values		303	8.1	51.1	96.3	18.7	3.4	21.5	31.4	10.9	17.9	27.8	1.4	2	0.5	3.1	3	5.57	39.5	16.3	38.8	20.4	25	19.2	1.5	0.0026	3.5	5.2
JR-2	Rhyolite	2015-02-01			294.371	7.12478	51.3047	98.2604	19.5614	1.78925	20.2734	31.8685	9.40959	15.8884	27.3465	0.943283	3.80946	-0.0737116	-3.34613	0.914855	5.30241	30.1228	17.1045	35.5811	21.9194	26.0977	18.7633	1.60386	-0.135262	3.72793	4.2168
JR-2	Rhyolite	2015-04-01			294.034	6.83803	51.0201	98.0241	19.2906	1.8805	19.9611	31.0118	9.16117	16.0028	27.8585	0.805458	3.94574	-1.31717	-3.62836	0.125033	4.8899	26.5012	16.3605	37.777	21.1929	24.5535	17.9884	2.43067	-0.546969	3.59613	4.04501
JR-2	Rhyolite	2015-06-01			294.054	6.83888	51.6458	98.03	19.1814	1.91908	20.472	31.4957	9.74972	16.3844	26.7708	1.23552	3.20083	-1.84872	-3.2015	1.24752	5.66507	24.3938	16.2799	37.1243	21.9944	26.028	18.0507	1.1355	-0.539793	3.88569	4.38864
JR-2	Rhyolite	2015-08-01			293.58	6.69827	51.7441	97.0932	19.0768	1.7597	20.7517	31.8663	10.0048	16.2543	26.1992	1.24981	3.07509	-2.32986	-2.85804	0.453891	5.96113	23.2681	17.3412	32.2611	20.1166	26.4884	17.9026	2.83798	-0.578629	2.91559	4.5971
JR-2	Rhyolite	2015-10-01	AXRHT1496,97,98		294.392	6.85168	51.1421	97.193	19.522	1.79039	20.4806	30.7085	10.0087	16.0102	25.7132	0.697014	3.63685	-1.00718	-1.70544	-0.121791	5.21599	31.2868	15.9802	35.9923	22.9134	24.5413	18.272	1.4739	-0.53964	2.98511	3.99288
JR-2	Rhyolite	2015-11-30	AXRHT1514,15,16		294.143	6.94032	51.1928	97.1616	19.3321	2.03928	19.7974	31.5891	9.25255	16.4155	26.0745	0.826653	3.92521	-2.30801	-2.47607	0.0278593	6.01701	24.2692	16.8339	37.1117	21.5549	27.871	17.9364	1.6293	-0.236859	4.05141	4.19082
JR-2	Rhyolite	2016-01-31	AXRHT1538,39,40		293.76	6.74557	50.3917	96.7825	19.2988	1.76718	20.3453	31.5702	9.53762	16.052	25.824	1.23629	3.57938	-0.757054	-2.54696	-0.453111	3.90228	27.2448	16.0651	36.0514	21.0318	26.452	17.8309	0.899824	-0.0521505	3.2956	4.82115
JR-2	Rhyolite	2016-07-31	AXRHT1544,45,46		294.705	7.30221	50.1674	94.4102	19.2485	1.42798	20.9431	31.521	9.79712	16.2576	25.7982	0.301723	4.17906	-0.464515	-4.17268	-0.671067	6.87405	28.0726	16.7024	37.4695	20.7454	27.2428	18.0571	2.83437	0.23816	2.77863	5.51361
Avg.					294.13	6.91747	51.0761	97.1194	19.314	1.79667	20.3781	31.4539	9.61516	16.1581	26.4481	0.911969	3.66895	-1.26328	-2.9919	0.190398	5.47848	26.8949	16.5835	36.1711	21.4336	26.1593	18.1002	1.85568	-0.298893	3.40451	4.47075
St.Dev					0.361039	0.202111	0.552686	1.2195	0.162015	0.176933	0.378199	0.401993	0.325963	0.195175	0.797687	0.329982	0.37855	0.840889	0.765849	0.654233	0.881245	2.87044	0.492369	1.76232	0.860428	1.16592	0.298663	0.750818	0.301358	0.479561	0.505046
RSD (%)					0.122748	2.92175	1.08208	1.25567	0.838848	9.84784	1.85591	1.27804	3.3901	1.20791	3.01604	36.1835	10.3177	-66.564	-25.5974	343.613	16.0856	10.6728	2.96903	4.87219	4.01439	4.45699	1.65006	40.4606	-100.825	14.086	11.2967
JR-3	Rhyolite		Rec. values		453	10.4	172	1678	535	0.49	32.8	112	21.1	36.6	209	2.9	1.6	0.98	3.5	4.2	0.5	65.8	179	327	107	10	1.1	0.17	0	17.4	7.8
JR-3	Rhyolite	2015-02-01			463.681	7.52325	171.413	1685.57	542.668	-0.38249	36.2698	113.166	21.3152	38.3186	191.272	5.59328	5.47579	3.01018	-7.11406	-2.1727	-0.472745	58.722	172.166	313.226	103.139	7.82791	1.27934	0.270297	-0.296605	20.9146	8.00268
JR-3	Rhyolite	2015-04-01			463.55	7.93762	171.385	1685.48	542.513	-0.252978	35.6766	112.749	21.3172	38.5204	193.002	5.40514	5.46403	3.49974	-8.43796	-0.813467	2.41368	55.174	170.177	317.271	104.695	7.67282	0.221208	0.0111293	-0.521766	21.4112	7.92899
JR-3	Rhyolite	2015-06-01			463.039	7.69161	171.115	1684.19	542.201	-0.602949	35.5673	112.866	21.1006	38.2039	192.549	6.31016	5.26847	4.02739	-9.2724	-2.48238	0.0632846	58.5026	169.966	310.849	101.486	10.248	0.279926	0.126965	-0.0164585	20.0855	8.08123
JR-3	Rhyolite	2015-08-01			463.514	7.35747	171.371	1681.21	542.282	-0.463261	35.0767	112.454	20.7751	37.2054	196.049	6.00422	4.93499	3.70826	-7.79453	-0.756477	1.44219	53.0338	171.546	311.328	101.157	9.28361	0.977894	1.20239	0.148059	20.665	9.01939
JR-3	Rhyolite	2015-10-01	AXRHT1496,97,98		463.866	7.59565	171.028	1681.03	542.437	-0.304542	35.1277	113.088	21.0759	37.8717	195.578	5.30858	5.72853	3.78114	-7.015	-0.495659	0.902003	57.9063	170.22	310.731	101.263	9.4562	1.15098	-0.18879	-0.703143	20.5691	8.62589
JR-3	Rhyolite	2015-11-30	AXRHT1514,15,16		463.798	7.64994	171.535	1681.59	542.118	-0.458896	35.6339	112.918	21.3517	36.0336	194.948	5.51619	7.24648	5.62653	-7.63957	-0.922259	1.49123	55.2262	170.803	314.041	103.813	9.17181	0.301926	-0.363623	-0.072698	20.3921	8.78985
JR-3	Rhyolite	2016-01-31	AXRHT1538,39,40		463.689	7.54767	170.894	1681.5	542.478	-0.154547	35.9319	112.577	20.9519	38.3252	197.471	5.61396	5.58709	2.40528	-8.30454	-0.215902	1.39385	54.8602	169.76	314.952	103.673	8.488	0.499631	-0.870626	0.168827	20.5021	9.69568
JR-3	Rhyolite	2016-07-31	AXRHT1544,45,46		464.53	7.89645	170.672	1675.46	542.406	0.802654	35.5352	112.797	20.5613	38.3432	197.056	5.13795	5.72497	3.55739	-7.62531	-0.17247	0.417375	55.3865	168.059	314.109	104.258	8.12925	-0.0188187	0.652217	-0.0338174	20.2585	8.82032
Avg.					463.709	7.64996	171.177	1682	542.388	-0.227126	35.6024	112.827	21.0561	37.8527	194.741	5.61119	5.67879	3.70199	-7.90042	-1.00391	0.956357	56.1014	170.337	313.313	102.936	8.7847	0.586511	0.104994	-0.16595	20.5998	8.6205
St.Dev					0.417413	0.192821	0.298941	3.25986	0.17892	0.438705	0.390595	0.239785	0.282781	0.843349	2.24019	0.379919	0.684481	0.92874	0.745641	0.864099	0.923554	2.03467	1.23766	2.27402	1.42747	0.89924	0.483177	0.63224	0.314286	0.4134	0.601718
RSD (%)					0.0900163	2.52055	0.174639	0.193808	0.0329874	-193.155	1.0971	0.212525	1.34299	2.22797	1.15034	6.77074	12.0533	25.0876	-9.43799	-86.073	96.57	3.62676	0.726592	0.725798	1.38676	10.2364	82.3816	602.165	-189.386	2.00682	6.98008
